# Supplementary material for: Acarbose-metformin is more effective in glycemic variability control than repaglinide-metformin in T2DM patients inadequately controlled with metformin: a retrospective cohort study
Source: PeerJ. 2020 Oct 2;8:e9905. doi: 10.7717/peerj.9905 (PMC7537614; doi:10.7717/peerj.9905)
Supplement: Supplemental Information 1 — Each row represents a participant and each column represents a parameter about the participants. [file peerj-08-9905-s001.xlsx]

## Sheet: Raw Data Source
Group (1: M+A; 2: M+R)	gender	ethnic group	age	grouping based on age	education	medical history	grouping based on MRN	BMI	grouping based on BMI	hypertension	hypertension_A	CVD	CVD_A	CKD	CKD_A	FPG（before）	FPG (Post-treatment)	fasting difference	2hPG (before)	2hPG (Post-treatment)	2hPG（Post-treatment）	Postprandial differences in blood sugar	SDBG (Pre-treatment)	SDBG (Post-treatment)	Group according to SDBG (Post-treatment)	SDBG difference	MAGE (Pre-treatment)	MAGE (Post-treatment)	MAGE (Post-treatment)	PPGE (Pre-treatment)	PPGE (Post-treatment)	Group according to PPGE (Post-treatment)	PPGE difference	LAGE (Pre-treatment)	LAGE (Post-treatment)	LAGE (Post-treatment)	LAGE difference	HbA1c	HbA1c (Endpoint)	Glycosylated serum protein normal range (1.7-2.8mmol/L)	Glycosylated serum protein (Endpoint)	24h urine protein	Group according to 24h urine protein	TG	Group according to TG	TC	Group according to TC	HDL	Group according to HDL
1	1	2	61	1	0	6	1	24.91	2	Y	1	Y	0	Y	1	5.8	6.2	0.44	18	9.8	2	-8.2	4.81273	2.73078	2	-2.08195	6.86667	3.3	1	6.86667	3.3	2	-3.56667	12.6	5.8	2	-6.8	6.9	5.9	2.14	2.28	0.155	0	2.59	0	5.8	0	0.8	0
1	1	2	51	2	1	10	1	24.21	2	Y	1	Y	0	Y	1	6.2	6.7	0.52	13	9.9	2	-3.1	1.96105	2.86107	2	0.900019	2.8	3	1	2.8	3	2	0.2	6.6	3.8	1	-2.8	7.2	6.5	2.34	2.22	0.027	1	2.98	0	4.27	1	1.22	1
1	1	1	51	2	0	1	0	31.02	1	N	0	Y	0	Y	1	13.3	8.3	-4.96	15.9	10.7	2	-5.2	5.91185	2.78516	2	-3.12669	6.4	2.2	1	6.4	2.2	2	-4.2	17.2	4.8	2	-12.4	10.5	8.8	3.75	2.07	0.023	1	13.58	0	6.69	0	1.04	1
1	2	2	57	2	0	10	1	24.88	2	Y	1	Y	0	Y	1	7.9	6.8	-1.13	11.1	12.3	3	1.2	1.29413	3.37215	2	2.07803	1.16667	3.1	1	1.16667	3.1	2	1.93333	4	7.1	2	3.1	8	7.5	2.31	2.59	0.021	1	1.2	1	3.29	1	1.58	1
1	1	2	47	2	1	3	0	27.68	2	Y	1	Y	0	N	0	8.7	8.2	-0.53	12.2	9.4	2	-2.8	1.38048	2.79285	2	1.41237	2.4	1.93333	1	2.4	1.93333	1	-0.466667	3.1	3.3	1	0.2	7.8	6.2	2.56	2.33	0.011	1	6.15	0	3.13	1	0.86	0
1	1	2	48	2	1	3	0	23.45	3	Y	1	N	1	Y	1	12.4	5.1	-7.3	13.1	15.3	3	2.2	2.42821	2.98807	2	0.559864	3.8	4.13333	2	3.8	4.13333	2	0.333333	6.9	10.2	2	3.3	10.5	9.5	2.85	2.54	0.104	1	2.08	0	4.44	1	1.17	1
1	1	1	47	2	0	1	0	21.9	3	N	0	N	1	Y	1	7.6	9.2	1.59	13.8	18.8	3	5	3.47323	3.41635	2	-0.0568837	3.9	6.03333	2	3.9	6.03333	2	2.13333	7.5	10.6	2	3.1	9.1	8.5	2.28	2.04	0.06	1	2.25	0	4	1	0.73	0
1	1	2	40	2	0	5	1	24.51	2	N	0	N	1	Y	1	6.5	10.9	4.44	12.8	11.5	3	-1.3	2.69797	3.16905	2	0.471076	3.96667	0.866667	1	3.96667	0.866667	1	-3.1	6.9	4.8	2	-2.1	7.3	6.7	2.36	2.06	0.081	1	2.7	0	4.88	1	1.16	1
1	1	2	47	2	0	15	1	28.41	1	N	0	Y	0	Y	1	6.7	7.8	1.07	21.5	15.4	3	-6.1	5.17508	3.13961	2	-2.03547	7.06667	4.53333	2	7.06667	4.53333	2	-2.53333	14.8	8.9	2	-5.9	9.5	8.5	3.18	3.15	0.033	1	2.06	0	4.45	1	1	0
1	1	2	61	1	0	15	1	27.7	2	Y	1	Y	0	Y	1	7	7.4	0.39	11.5	9.3	2	-2.2	1.89737	2.99046	2	1.09309	3.43333	2.2	1	3.43333	2.2	2	-1.23333	4.8	7.7	2	2.9	7.7	7.2	4.12	2.2	0.206	0	1.46	1	3.3	1	1.07	1
1	1	2	48	2	1	10	1	23.45	3	Y	1	N	1	Y	1	12.4	8.2	-4.2	15.3	9.4	2	-5.9	3.70983	2.94473	2	-0.765104	4.03333	1.63333	1	4.03333	1.63333	1	-2.4	10.3	3	1	-7.3	10.5	8.5	2.85	2.54	0.104	1	2.08	0	4.44	1	1.17	1
1	1	1	47	2	0	2	0	27.89	2	N	0	N	1	Y	1	9.5	8.2	-1.3	18.8	15.7	3	-3.1	4.27384	3.13961	2	-1.13423	7.9	2.76667	1	7.9	2.76667	2	-5.13333	11.5	7.5	2	-4	9.1	7.8	2.28	1.98	0.06	1	2.25	0	4	1	0.73	0
1	1	2	30	3	0	0.5	0	22.5	3	N	0	N	1	Y	1	12.5	10.9	-1.6	13.6	11.5	3	-2.1	2.27847	2.98807	2	0.709601	1.93333	1.16667	1	1.93333	1.16667	1	-0.766667	6.9	5.5	2	-1.4	7.3	7.1	2.36	2.05	0.081	1	2.7	0	4.88	1	1.16	1
1	1	2	47	2	0	15	1	28.41	1	N	0	Y	0	Y	1	7.5	7.8	0.3	21.5	10.2	2	-11.3	4.68676	2.98807	2	-1.69869	6.16667	2.86667	1	6.16667	2.86667	2	-3.3	13.7	5.1	2	-8.6	9.5	8.5	3.18	3.15	0.033	1	2.06	0	4.45	1	1.1	1
1	1	2	61	1	0	15	1	27.7	2	Y	1	Y	0	Y	1	6.3	7.4	1.1	11.5	12.6	3	1.1	1.73178	2.98568	2	1.2539	2.9	3.43333	1	2.9	3.43333	2	0.533333	5	8	2	3	7.7	7.2	4.12	2.2	0.206	0	1.46	1	3.3	1	1.07	1
1	1	2	51	2	1	8	1	23.38	3	Y	1	N	1	N	0	5.7	5.6	-0.1	15.2	8.6	2	-6.6	3.74166	2.50428	2	-1.23738	5.93333	1.66667	1	5.93333	1.66667	1	-4.26667	9.6	3.5	1	-6.1	6.3	6	2.18	1.97	0.052	1	1.17	1	3.68	1	1.36	1
1	1	1	49	2	1	7	1	27.77	2	N	0	Y	0	N	0	12.3	8.3	-4	14.4	10.4	2	-4	2.55399	2.94715	2	0.393165	3.53333	2.86667	1	3.53333	2.86667	2	-0.666667	6.6	4.7	2	-1.9	9.5	9.3	3.4	3.11	0.016	1	0.89	1	3.74	1	1.34	1
1	1	2	42	2	0	5	1	40.68	1	Y	1	Y	0	Y	1	13.8	6.9	-6.94	25.6	9.4	2	-16.2	5.06454	3.09146	2	-1.97307	7.6	2.06667	1	7.6	2.06667	1	-5.53333	14.7	5.1	2	-9.6	10.2	8.2	2.72	2.02	0.099	1	3.92	0	4.6	1	1.26	1
1	1	2	51	2	0	16	1	26.47	2	N	0	Y	0	N	0	15.5	4.4	-11.05	20.5	9.2	2	-11.3	5.88529	2.52134	2	-3.36395	3.23333	2.4	1	3.23333	2.4	2	-0.833333	14.6	4.8	2	-9.8	8.5	7.3	2.79	2.22	0.006	1	2.13	0	4.7	1	0.84	0
1	1	2	46	2	1	10	1	23.81	3	Y	1	N	1	Y	1	9.5	6.4	-3.14	14.7	12.1	3	-2.6	2.7374	3	2	0.262605	4.86667	3.46667	1	4.86667	3.46667	2	-1.4	6.2	5.7	2	-0.5	8.1	7	3.06	2.3	0.091	1	6.71	0	4.52	1	0.89	0
1	1	2	44	2	0	4	0	23.36	3	N	0	N	1	Y	1	5.9	8.8	2.89	13.4	11.9	3	-1.5	3.09985	3.12593	2	0.026082	3.9	4.2	2	3.9	4.2	2	0.3	7.7	7.6	2	-0.1	6.4	6.2	2.13	1.75	0.004	1	3.98	0	5.11	1	0.73	0
1	1	2	59	2	0	1	0	24.64	2	Y	1	Y	0	Y	1	7.2	7.3	0.12	16	9.5	2	-6.5	3.67488	2.99523	2	-0.679648	4.63333	1.26667	1	4.63333	1.26667	1	-3.36667	9.7	5.8	2	-3.9	7.6	7.4	2.44	2.01	0.002	1	1.84	0	4.41	1	1.11	1
1	1	2	58	2	0	22	1	22.84	3	Y	1	Y	0	Y	1	2.9	5	1.06	24.6	12.3	3	-12.3	5.83067	2.64845	2	-3.18222	5.6	2.66667	1	5.6	2.66667	2	-2.93333	18	7.3	2	-10.7	8.3	8	3.54	2.8	0.027	1	0.93	1	3.97	1	1.61	1
1	2	1	43	2	0	13	1	26.85	2	Y	1	Y	0	Y	1	9.4	10.3	0.93	12.1	14.8	3	2.7	3.29935	3.55769	2	0.258337	5.43333	2.63333	1	5.43333	2.63333	2	-2.8	8.2	4.5	2	-3.7	10.2	9.6	3.52	2.85	0.211	0	2.5	0	4.11	1	0.85	0
1	1	2	49	2	0	7	1	23.41	3	Y	1	N	1	Y	1	4.8	6.1	1.28	13.8	10.5	2	-3.3	2.84061	2.79029	2	-0.0503176	3.26667	2.7	1	3.26667	2.7	2	-0.566667	8	4.4	2	-3.6	6.3	5.9	1.92	1.74	0.046	1	1.82	0	3.18	1	0.68	0
1	2	2	41	2	1	6	1	24.52	2	Y	1	N	1	N	0	7.8	7.4	-0.42	17.8	10.1	2	-7.7	3.85746	2.89828	2	-0.959185	3.9	2.9	1	3.9	2.9	2	-1	11.7	5.9	2	-5.8	7.7	6.9	2.5	2.38	0.031	1	2.18	0	2.78	1	0.76	0
1	1	2	47	2	0	7	1	27.06	2	Y	1	N	1	Y	1	9	6.9	-2.11	26.9	14.4	3	-12.5	4.94224	3.20936	2	-1.73288	5.06667	4.86667	2	5.06667	4.86667	2	-0.2	14.4	7.5	2	-6.9	10.3	7.8	4.02	3.55	0.161	0	0.64	1	3.63	1	1.31	1
1	1	2	76	1	0	5	1	24.24	2	Y	1	Y	0	Y	1	9.2	8	-1.15	15.9	11.7	3	-4.2	2.84119	3.28634	2	0.445142	4.73333	4.1	2	4.73333	4.1	2	-0.633333	7	8.4	2	1.4	8.1	7.6	3.07	2.6	0.11	1	0.9	1	2.97	1	1.32	1
1	1	2	48	2	0	10	1	33.25	1	Y	1	Y	0	Y	1	8.7	8.4	-0.27	17.3	12.9	3	-4.4	2.99992	3.0449	2	0.0449814	4.73333	3.53333	1	4.73333	3.53333	2	-1.2	8.9	5.4	2	-3.5	8	7.2	2.32	2.11	0.07	1	1.1	1	2.6	1	0.82	0
1	1	1	64	1	0	7	1	27.53	2	Y	1	Y	0	Y	1	13.7	6.7	-7.01	18.1	10	2	-8.1	5.05861	2.74643	2	-2.31218	8.6	1.86667	1	8.6	1.86667	1	-6.73333	13.7	4.7	2	-9	8.2	6.9	3.22	2	0.023	1	1.93	0	1.77	1	1.02	0
1	2	2	30	3	1	1	0	23.78	3	N	0	N	1	Y	1	10.2	8.4	-1.78	21.3	8.8	2	-12.5	4.11895	3.09608	2	-1.02287	6.83333	2.9	1	6.83333	2.9	2	-3.93333	11.4	4.9	2	-6.5	7.7	6	2.79	1.53	0.042	1	3.72	0	4.81	1	0.86	0
1	2	2	53	2	0	5	1	22.1	3	Y	1	Y	0	Y	1	8.4	7.4	-0.97	17	8.6	2	-8.4	3.38167	2.93744	2	-0.44423	4.36667	1.63333	1	4.36667	1.63333	1	-2.73333	9.9	2.7	1	-7.2	9.3	8.8	5.19	2.17	0.144	1	2.34	0	3.9	1	1.14	1
1	2	1	45	2	0	2	0	28.67	1	N	0	Y	0	Y	1	14.3	8.4	-5.91	23.3	12.4	3	-10.9	4.91078	3.19151	2	-1.71927	4.66667	3.3	1	4.66667	3.3	2	-1.36667	16.4	4.7	2	-11.7	12.9	9.3	2.24	1.2	0.074	1	1.45	1	3.27	1	1.32	1
1	1	1	43	2	1	5	1	27.99	2	N	0	N	1	Y	1	7.1	5.6	-1.52	21.2	9	2	-12.2	4.96914	2.78516	2	-2.18398	6.26667	2.8	1	6.26667	2.8	2	-3.46667	13.6	4.3	1	-9.3	11.4	9.2	3.79	2.85	0.069	1	1.63	1	4.04	1	0.72	0
1	1	2	44	2	0	14	1	26.37	2	N	0	N	1	Y	1	10.5	6.9	-3.55	20.9	7.9	2	-13	4.08447	2.76715	2	-1.31731	6.2	1.9	1	6.2	1.9	1	-4.3	11.7	5.2	2	-6.5	8.8	7.6	2.8	2.13	0.089	1	1.05	1	4.44	1	1.23	1
1	1	1	47	2	0	12	1	26.2	2	Y	1	Y	0	Y	1	5.4	6	0.59	20	7.5	1	-12.5	5.31973	2.73078	2	-2.58895	8.6	2.36667	1	8.6	2.36667	2	-6.23333	13.6	4	1	-9.6	6	6.2	2.62	1.95	0.051	1	0.98	1	2.58	1	0.86	0
1	1	2	54	2	1	10	1	38.2	1	Y	1	Y	0	Y	1	13.8	10.4	-3.4	24.2	12.4	3	-11.8	5.0759	3.35517	2	-1.72073	8.63333	1.8	1	8.63333	1.8	1	-6.83333	12.3	2.6	1	-9.7	9.8	9	2.34	2.61	4.655	0	3.97	0	6.87	0	0.92	0
1	1	2	59	2	1	7	1	22.72	3	Y	1	Y	0	N	0	12.1	6.5	-5.6	11.9	11.4	3	-0.5	3.02702	2.76715	2	-0.259867	5.4	2.53333	1	5.4	2.53333	2	-2.86667	8.2	6	2	-2.2	11.4	10.8	3.41	2.09	0.07	1	3.93	0	4.53	1	0.78	0
1	1	2	28	3	1	5	1	22.46	3	N	0	N	1	Y	1	11.8	7.2	-4.61	13.7	11.1	3	-2.6	4.50994	3.12593	2	-1.38401	6.63333	2.66667	1	6.63333	2.66667	2	-3.96667	12.1	5	2	-7.1	12.9	8.9	3.64	3.47	0.067	1	2.29	0	6.21	0	0.84	0
1	2	2	72	1	0	20	1	30.49	1	Y	1	N	1	N	0	12.7	7.6	-5.05	17.6	10.2	2	-7.4	3.74051	3.03315	2	-0.707362	6.23333	2.46667	1	6.23333	2.46667	2	-3.76667	10.6	3.8	1	-6.8	10.7	9.6	3.05	2.22	0.032	1	0.89	1	4.26	1	1.11	1
1	1	2	65	1	0	15	1	23.38	3	Y	1	Y	0	Y	1	5.2	5.1	-0.14	17.7	7.9	2	-9.8	4.67098	2.92282	2	-1.74817	6.83333	3.03333	1	6.83333	3.03333	2	-3.8	14.7	6.1	2	-8.6	6.9	5.6	2.47	2.68	0.064	1	1.54	1	2.95	1	1.1	1
1	1	2	44	2	0	14	1	26.37	2	N	0	N	1	Y	1	10.5	6.9	-3.55	20.9	7.9	2	-13	3.94691	2.71504	2	-1.23187	5.13333	1.1	1	5.13333	1.1	1	-4.03333	11.7	2.3	1	-9.4	8.8	7.6	2.8	2.35	0.089	1	1.05	1	4.44	1	1.23	1
1	2	2	67	1	0	2	0	32.34	1	Y	1	Y	0	Y	1	13.4	5.5	-7.89	11.9	9.7	2	-2.2	3.50279	2.73861	2	-0.764175	4.9	3.43333	1	4.9	3.43333	2	-1.46667	9.6	4.5	2	-5.1	13.9	13.8	3.77	3.11	0.021	1	1.17	1	4.75	1	1.3	1
1	2	2	69	1	0	5	1	24.22	2	N	0	N	1	Y	1	7.1	7.8	0.72	15.6	10.8	2	-4.8	3.45722	2.98568	2	-0.471541	6.2	3.26667	1	6.2	3.26667	2	-2.93333	7.9	4	1	-3.9	8.9	7.2	2.44	2.01	0.313	0	1.3	1	4.93	1	1.34	1
1	2	2	63	1	0	5	1	20.96	3	Y	1	Y	0	Y	1	12.6	4.7	-7.86	24.6	9.2	2	-15.4	5.48808	2.90074	2	-2.58734	10.6	2.46667	1	10.6	2.46667	2	-8.13333	13.3	8	2	-5.3	14.1	8.3	3.33	2.18	0.033	1	1.28	1	6.48	0	1.63	1
1	1	2	74	1	0	7	1	22.31	3	Y	1	Y	0	Y	1	6.1	5.3	-0.76	11.3	10.9	2	-0.4	1.48821	2.74382	2	1.25562	2.86667	3.83333	1	2.86667	3.83333	2	0.966667	3.4	5.6	2	2.2	6.2	6	2.33	2.49	0.047	1	1.09	1	6.56	0	1.65	1
1	1	2	79	1	0	8	1	22.06	3	Y	1	Y	0	Y	1	8.6	4.9	-3.65	17.8	9.4	2	-8.4	5.89233	3.07525	2	-2.81708	11.4333	3.7	1	11.4333	3.7	2	-7.73333	14.4	11	2	-3.4	8.6	7.2	3.09	2.64	0.347	0	2.27	0	4.09	1	0.7	0
1	1	2	53	2	0	4	0	26.98	2	N	0	Y	0	Y	1	10.9	9	-1.89	22.1	13.8	3	-8.3	4.28697	3.34877	2	-0.938194	8.36667	3.9	2	8.36667	3.9	2	-4.46667	10.6	6.3	2	-4.3	9.5	7.9	3.23	3.01	0.054	1	1.77	0	4.05	1	0.93	0
1	1	2	55	2	0	12	1	26.36	2	Y	1	Y	0	Y	1	8.1	6.3	-1.77	12.2	7.2	1	-5	2.68745	2.68594	2	-0.00150654	2.43333	1.36667	1	2.43333	1.36667	1	-1.06667	7.9	3	1	-4.9	6.5	6.3	2.48	2.6	0.072	1	0.84	1	4.85	1	1.95	1
1	2	2	56	2	0	3	0	25.96	2	Y	1	N	1	Y	1	5.3	6.4	1.13	13.9	11.7	3	-2.2	4.57925	3.13733	2	-1.44192	8.6	5.3	2	8.6	5.3	2	-3.3	10.8	6.9	2	-3.9	7.9	6.2	2.08	1.9	0.095	1	1.38	1	4.23	1	1.28	1
1	1	2	44	2	0	12	1	25.24	2	N	0	N	1	Y	1	10.2	7.7	-2.5	18.2	9.5	2	-8.7	4.09186	2.83095	2	-1.26091	6.93333	1.63333	1	6.93333	1.63333	1	-5.3	10.6	5	2	-5.6	9.9	9.3	4.11	2.57	0.067	1	4.17	0	5.23	0	0.68	0
1	1	2	45	2	0	10	1	21.61	3	Y	1	Y	0	Y	1	8.9	7.2	-1.65	22	7.3	1	-14.7	4.64881	2.81831	2	-1.8305	5.63333	2.5	1	5.63333	2.5	2	-3.13333	13.8	4.7	2	-9.1	7.7	7.2	2.67	2.28	0.323	0	2.02	0	3.78	1	1.18	1
1	1	2	54	2	0	15	1	24.02	2	N	0	Y	0	Y	1	11.1	7	-4.1	13.2	7.5	1	-5.7	5.78043	2.88593	2	-2.8945	9.76667	2.3	1	9.76667	2.3	2	-7.46667	15.3	6.3	2	-9	11.2	9.5	3.52	2.6	0.035	1	2.44	0	5.22	0	0.93	0
1	1	2	46	2	1	3	0	24.16	2	Y	1	N	1	Y	1	11.4	7.2	-4.19	17.2	7.5	1	-9.7	2.29617	2.74643	2	0.45026	3.1	1.66667	1	3.1	1.66667	1	-1.43333	7	4.4	2	-2.6	9.4	8.9	2.6	2.34	1.675	0	1.7	1	4.13	1	1.29	1
1	1	2	52	2	0	5	1	25.25	2	N	0	Y	0	Y	1	8.7	6.9	-1.84	24	11.4	3	-12.6	5.80644	2.93014	2	-2.8763	10.6667	2.4	1	10.6667	2.4	2	-8.26667	15.6	4.5	2	-11.1	8.9	8.3	2.69	1.55	0.05	1	3.11	0	5.37	0	0.88	0
1	1	1	56	2	1	21	1	23.14	3	Y	1	Y	0	N	0	12.8	9.3	-3.54	18.3	10.5	2	-7.8	4.13901	3.18703	2	-0.951986	7.03333	2.2	1	7.03333	2.2	2	-4.83333	11.5	5.4	2	-6.1	10.5	10.2	4.01	2.2	0.01	1	2.86	0	2.96	1	0.63	0
1	2	2	52	2	0	12	1	24.26	2	N	0	N	1	N	0	2.2	8.7	4.96	14.6	8.9	2	-5.7	3.60496	2.89828	2	-0.706682	5.73333	1	1	5.73333	1	1	-4.73333	10.3	3.6	1	-6.7	7.6	7.1	2.83	2.45	0.02	1	0.96	1	3.45	1	1.1	1
1	1	2	60	2	1	3	0	20.76	3	Y	1	Y	0	N	0	5.4	6.8	1.4	14.3	9.7	2	-4.6	3.05996	2.85857	2	-0.201385	4.53333	3.26667	1	4.53333	3.26667	2	-1.26667	9	4.3	1	-4.7	6	5.6	2.18	1.69	0.034	1	2.48	0	5.62	0	1.3	1
1	2	2	62	1	0	1	0	26.22	2	Y	1	Y	0	Y	1	9	5.8	-3.18	25.1	6.6	1	-18.5	5.84535	2.82843	2	-3.01692	10.6667	1.36667	1	10.6667	1.36667	1	-9.3	16.7	4.6	2	-12.1	12.4	11.5	3.26	2.55	0.04	1	1.51	1	5.31	0	1.28	1
1	1	1	53	2	0	1	0	29.38	1	N	0	Y	0	Y	1	5.2	6.2	1.01	11.3	14.2	3	2.9	3.46623	3.08452	2	-0.381708	5.03333	2.86667	1	5.03333	2.86667	2	-2.16667	8.3	8	2	-0.3	8.3	7.3	2.67	2.01	0.005	1	1.84	0	3.58	1	0.66	0
1	2	2	55	2	0	20	1	23.14	3	N	0	N	1	Y	1	4.3	5.3	0.98	19.7	11	2	-8.7	5.2792	2.76199	2	-2.51722	8.76667	2.8	1	8.76667	2.8	2	-5.96667	15.1	5.7	2	-9.4	7.5	6.8	2.65	2.1	0.007	1	0.5	1	5.17	1	1.77	1
1	2	1	55	2	0	3	0	24.03	2	N	0	Y	0	N	0	7.1	6.7	-0.37	21.2	10	2	-11.2	5.2289	2.87104	2	-2.35787	9.36667	2.1	1	9.36667	2.1	1	-7.26667	14.1	3.3	1	-10.8	7.5	6.8	2.25	1.99	0.067	1	1.33	1	6.95	0	1.02	0
1	2	2	69	1	0	4	0	23.43	3	N	0	Y	0	Y	1	14.5	12.9	-1.65	16.1	14.1	3	-2	2.44043	3.79285	2	1.35242	3.93333	2.13333	1	3.93333	2.13333	1	-1.8	5.9	3.8	1	-2.1	10.1	8.9	4.02	3.27	0.006	1	4.48	0	5.85	0	1.01	0
1	2	2	61	1	0	10	1	30.86	1	Y	1	Y	0	Y	1	7.4	8.5	1.03	19.9	9.7	2	-10.2	3.74821	2.98329	2	-0.764919	4.13333	1.66667	1	4.13333	1.66667	1	-2.46667	11.6	4.1	1	-7.5	10.2	8.4	3.48	3.1	0.19	0	0.99	1	2.38	1	1.19	1
1	1	2	54	2	0	17	1	23.57	3	Y	1	N	1	Y	1	8.3	7.5	-0.78	18.9	14.6	3	-4.3	2.71346	3.44549	2	0.732035	5.06667	4.33333	2	5.06667	4.33333	2	-0.733333	7.2	9.3	2	2.1	9.4	8	2.72	2.15	0.069	1	2.34	0	4.94	1	1.35	1
1	2	1	57	2	0	9	1	26.06	2	Y	1	Y	0	Y	1	11.3	10	-1.27	18.7	13.2	3	-5.5	3.53903	3.35942	2	-0.179612	6.93333	1.53333	1	6.93333	1.53333	1	-5.4	8.4	3.4	1	-5	9.4	6.8	2.86	2.12	0.092	1	2.09	0	3.39	1	0.88	0
1	1	2	59	2	0	12	1	25.61	2	Y	1	Y	0	Y	1	10	6.7	-3.34	20.5	7.9	2	-12.6	4.39848	2.64035	2	-1.75814	4.46667	1.23333	1	4.46667	1.23333	1	-3.23333	13.2	2.3	1	-10.9	8.8	7.5	3.22	2.8	0.085	1	1.54	1	5.96	0	1.65	1
1	1	1	59	2	0	8	1	27.55	2	Y	1	Y	0	Y	1	11.4	5.3	-6.1	19.5	5.8	1	-13.7	5.30076	2.77746	2	-2.5233	9.76667	1.33333	1	9.76667	1.33333	1	-8.43333	14.4	5.7	2	-8.7	8.9	6	2.54	1.86	0.038	1	1.48	1	3.8	1	0.96	0
1	2	2	73	1	0	3	0	25.39	2	N	0	Y	0	Y	1	6.3	6	-0.32	12	10.7	2	-1.3	2.16553	2.6886	2	0.523069	4.16667	2.1	1	4.16667	2.1	1	-2.06667	5.6	4.7	2	-0.9	6.9	6.2	2.03	1.75	0.08	1	0.49	1	2	1	0.8	0
1	1	1	54	2	0	19	1	26.47	2	Y	1	Y	0	Y	1	8.5	8.1	-0.41	21.3	9.3	2	-12	5.65184	3.08684	2	-2.565	11.0667	2.1	1	11.0667	2.1	1	-8.96667	13.8	7.5	2	-6.3	10.2	8.8	3.6	3.11	0.042	1	1.99	0	4.78	1	0.96	0
1	1	2	76	1	0	0.5	0	24.22	2	Y	1	Y	0	Y	1	8.8	8.7	-0.11	22.2	9.8	2	-12.4	6.3549	2.99523	2	-3.35967	11.6333	1.7	1	11.6333	1.7	1	-9.93333	15.3	3.8	1	-11.5	8.1	7.5	3.38	2.2	0.042	1	1.18	1	4.01	1	1.25	1
1	1	1	55	2	1	17	1	26.42	2	Y	1	Y	0	N	0	10.9	6.9	-4.08	21.8	9.9	2	-11.9	4.39496	2.88593	2	-1.50904	8.66667	3.03333	1	8.66667	3.03333	2	-5.63333	9.8	6.8	2	-3	10.1	8.9	3.76	2.85	0.13	1	1.22	1	4.83	1	1.5	1
1	2	2	66	1	0	15	1	22.48	3	Y	1	Y	0	Y	1	3.9	5.1	1.12	12.6	6.1	1	-6.5	2.80518	2.4756	2	-0.329587	5.26667	0.666667	1	5.26667	0.666667	1	-4.6	7.4	2.2	1	-5.2	6.5	7.3	2.68	2.05	0.051	1	0.74	1	2.52	1	1.04	1
1	1	1	68	1	0	10	1	24.8	2	N	0	N	1	Y	1	15.6	8	-7.68	16.6	8.2	2	-8.4	4.27818	2.72292	2	-1.55527	6.2	1.76667	1	6.2	1.76667	1	-4.43333	11.5	4.7	2	-6.8	11.9	9.1	3.77	2.4	0.016	1	2.22	0	5.35	0	0.81	0
1	1	2	51	2	0	2	0	25.65	2	Y	1	Y	0	Y	1	8.9	7.1	-1.84	28.3	10	2	-18.3	6.95304	2.89087	2	-4.06217	13.1667	3.3	1	13.1667	3.3	2	-9.86667	17.6	4.1	1	-13.5	11.6	10.5	2.63	2.21	0.025	1	1.26	1	4.75	1	1.21	1
1	1	2	38	3	0	2	0	39.81	1	N	0	N	1	Y	1	11.3	8	-3.28	16.6	12.8	3	-3.8	2.13218	3.14188	2	1.0097	2.43333	2.76667	1	2.43333	2.76667	2	0.333333	6.2	4.8	2	-1.4	11.3	9.8	3.75	3.75	0.085	1	11.5	0	5.3	0	0.67	0
1	2	2	70	1	0	8	1	25.78	2	Y	1	N	1	Y	1	4.7	6.5	1.84	12.1	11	2	-1.1	2.48088	2.99762	2	0.516739	1.76667	3.4	1	1.76667	3.4	2	1.63333	6.7	5.1	2	-1.6	9.7	6.2	2.63	2.26	0.021	1	0.92	1	3.76	1	1.31	1
1	1	2	42	2	0	1	0	26.08	2	N	0	N	1	Y	1	4.8	4.1	-0.69	6.1	5.3	1	-0.8	0.715808	2.29285	2	1.57704	1.1	1.13333	1	1.1	1.13333	1	0.0333333	1.7	2.3	1	0.6	5.1	6.2	2.04	1.37	0.055	1	2.03	0	3.73	1	1.1	1
1	1	1	55	2	0	15	1	26.99	2	Y	1	Y	0	N	0	7.5	3.9	-3.64	17.2	6.9	1	-10.3	3.06128	2.41128	2	-0.649996	4.93333	1.9	1	4.93333	1.9	1	-3.03333	8.2	4.1	1	-4.1	9.1	8.6	2.85	2.34	0.081	1	1.89	0	4.1	1	0.96	0
1	2	1	53	2	0	16	1	30.06	1	Y	1	Y	0	Y	1	11	11.9	0.11	25	17.5	3	-7.5	4.87227	3.46616	2	-1.40611	7.4	4.33333	2	7.4	4.33333	2	-3.06667	13.1	10.5	2	-2.6	11.8	12.4	3.23	2.23	0.077	1	9.8	0	6.36	0	0.93	0
1	1	2	66	1	0	20	1	32.11	1	Y	1	Y	0	Y	1	10.9	10.4	-0.48	24.2	19.2	3	-5	4.49868	3.96953	2	-0.52915	7.9	3.5	1	7.9	3.5	2	-4.4	11.8	8.8	2	-3	9.9	8.7	3.78	2	0.065	1	1.29	1	2.27	1	0.92	0
1	2	2	71	1	0	22	1	22.07	3	N	0	Y	0	Y	1	6.1	6.3	0.19	18.1	9	2	-9.1	4.46692	2.87104	2	-1.59588	6.36667	3.9	2	6.36667	3.9	2	-2.46667	13.5	6	2	-7.5	9.6	10.5	3.2	2.8	0.068	1	1.81	0	3.23	1	0.96	0
1	1	2	71	1	0	22	1	26.37	2	Y	1	Y	0	Y	1	7.6	7	-0.61	17.3	9.1	2	-8.2	3.84664	2.83599	2	-1.01065	6.53333	2.03333	1	6.53333	2.03333	1	-4.5	9.6	3.6	1	-6	8.5	7.8	2.22	1.3	0.056	1	1.53	1	3.51	1	1.16	1
1	1	2	53	2	0	10	1	24.54	2	Y	1	N	1	Y	1	14.5	10.2	-4.3	16.6	10.4	2	-6.2	3.53728	2.97129	2	-0.565993	4.4	0.7	1	4.4	0.7	1	-3.7	9.5	4.9	2	-4.6	12.2	10.5	2.78	1.65	0.012	1	1.04	1	5.02	1	1.18	1
1	1	1	73	1	0	3	0	24.68	2	Y	1	Y	0	Y	1	14.5	7.9	-6.61	14.4	8.3	2	-6.1	4.3249	2.80561	2	-1.51929	5.83333	0.833333	1	5.83333	0.833333	1	-5	12.9	1.7	1	-11.2	10.5	9.5	3.84	2.65	0.143	1	1.24	1	4.05	1	1.08	1
1	1	2	80	1	0	18	1	22.8	3	N	0	N	1	Y	1	7.6	13.5	5.91	17.4	16.3	3	-1.1	5.67933	3.4247	2	-2.25463	9.43333	3.4	1	9.43333	3.4	2	-6.03333	14.3	11	2	-3.3	7.8	7.3	3.16	2.78	0.005	1	1.33	1	4.42	1	1	0
1	1	2	46	2	1	10	1	25.91	2	N	0	Y	0	Y	1	13.4	9.2	-4.24	24.1	16.6	3	-7.5	5.3989	3.32523	2	-2.07367	8.53333	3.8	1	8.53333	3.8	2	-4.73333	13.6	7.8	2	-5.8	9.4	8.3	2.54	2.36	0.002	1	2.89	0	4.15	1	1.2	1
1	1	2	57	2	0	14	1	22.66	3	N	0	Y	0	N	0	6.9	6.3	-0.57	15.5	8.2	2	-7.3	5.49996	2.62406	2	-2.87589	9.5	1.43333	1	9.5	1.43333	1	-8.06667	13.9	2.3	1	-11.6	6.3	6	2.42	2.37	0.053	1	1.27	1	5	1	0.94	0
1	2	2	76	1	0	10	1	25.71	2	Y	1	N	1	Y	1	14.3	11.5	-2.83	16.3	11.6	3	-4.7	2.15517	3.42261	2	1.26744	3	3.3	1	3	3.3	2	0.3	5.6	9.7	2	4.1	9.4	7.8	3.23	1.62	0.053	1	1.45	1	3.96	1	1.96	1
1	2	2	49	2	0	2	0	23.33	3	N	0	Y	0	N	0	12.5	8.5	-3.97	26.7	13.7	3	-13	5.25688	3.37427	2	-1.88261	7.8	3.86667	1	7.8	3.86667	2	-3.93333	15.3	5.7	2	-9.6	8.3	7.2	3.33	2.18	0.01	1	11.31	0	7.2	0	1.44	1
1	2	1	62	1	0	13	1	35	1	Y	1	N	1	Y	1	19.2	7.5	-11.68	17.4	13.8	3	-3.6	5.99067	2.93744	2	-3.05322	7.66667	3	1	7.66667	3	2	-4.66667	16.4	8.7	2	-7.7	10.7	9	3.15	3.49	0.078	1	1.21	1	5.12	1	1.26	1
1	1	2	43	2	0	1	0	23.4	3	Y	1	N	1	N	0	9.5	6.7	-2.78	18.5	15.1	3	-3.4	3.78059	3.04256	2	-0.738034	5.13333	3.26667	1	5.13333	3.26667	2	-1.86667	10.2	8.4	2	-1.8	9.5	5.5	2.45	2.03	0.021	1	1.3	1	4.98	1	1.19	1
1	2	2	47	2	0	12	1	25.1	2	Y	1	Y	0	N	0	12.7	7	-5.67	8.8	9.5	2	0.7	2.1608	2.952	2	0.791199	3.33333	1.5	1	3.33333	1.5	1	-1.83333	6.5	2.5	1	-4	9.4	7.7	2.39	2	0.019	1	2.13	0	5.81	0	1.27	1
1	2	1	51	2	0	4	0	33.24	1	N	0	Y	0	Y	1	12.3	10.8	-1.52	24.8	19.5	3	-5.3	4.27701	3.77397	2	-0.503044	6.13333	5.36667	2	6.13333	5.36667	2	-0.766667	12.9	8.7	2	-4.2	12.5	7.5	2.42	2.61	0.009	1	1.61	1	4.1	1	1.13	1
1	1	1	64	1	0	20	1	29.01	1	Y	1	Y	0	Y	1	8.8	8.4	-0.42	10.9	10.9	2	0	2.20216	2.93258	2	0.730412	3.03333	2.36667	1	3.03333	2.36667	2	-0.666667	7	4	1	-3	8	6.5	1.93	1.89	0.206	0	0.66	1	2.09	1	1.05	1
1	2	2	64	1	0	10	1	21.48	3	N	0	Y	0	Y	1	12.7	7.9	-4.82	17.7	13	3	-4.7	3.74833	3.44549	2	-0.302839	5.4	4.73333	2	5.4	4.73333	2	-0.666667	10.8	7.5	2	-3.3	9.7	7.8	3.58	2.79	0.019	1	1.32	1	1.96	1	1.32	1
1	2	2	69	1	0	3	0	24.9	2	Y	1	Y	0	Y	1	7.1	8.5	1.4	18.1	9.2	2	-8.9	2.35897	3.07525	2	0.716272	4.03333	2.7	1	4.03333	2.7	2	-1.33333	7.4	4.9	2	-2.5	9.4	9.2	4.79	2.78	0.004	1	1.74	0	7.33	0	2.53	1
1	2	2	74	1	0	14	1	23.23	3	N	0	Y	0	Y	1	6.8	8.9	2.06	14.3	13.8	3	-0.5	3.9604	3.32738	2	-0.633024	6.4	2.56667	1	6.4	2.56667	2	-3.83333	10.1	5.6	2	-4.5	7.7	6.7	2.37	1.8	0.038	1	1.06	1	3.66	1	0.86	0
1	2	2	57	2	0	17	1	23.62	3	Y	1	N	1	N	0	7.6	7.5	-0.11	9.8	12	3	2.2	4.7539	3.1758	2	-1.57809	6.53333	4.73333	2	6.53333	4.73333	2	-1.8	11	5.7	2	-5.3	7.9	5.7	3.04	2.44	0.073	1	2.21	0	2.51	1	1.13	1
1	2	2	61	1	0	1	0	26.29	2	Y	1	Y	0	Y	1	15.8	11.3	-4.49	15.3	9.5	2	-5.8	4.89042	3.12821	2	-1.76221	0.7	1.1	1	0.7	1.1	1	0.4	15.3	6.3	2	-9	7.4	5.9	3.63	2.88	0.087	1	1.48	1	3.48	1	1.24	1
1	1	1	53	2	1	1	0	26.61	2	Y	1	Y	0	N	0	7.1	10.8	3.68	15	13	3	-2	2.10532	3.13733	2	1.03201	2.7	1.8	1	2.7	1.8	1	-0.9	5.9	6.6	2	0.7	7.3	6.2	2.8	2.33	0.04	1	3.25	0	6.01	0	0.96	0
1	1	1	52	2	1	12	1	26.47	2	Y	1	Y	0	Y	1	9.5	6.2	-3.3	12.4	6.3	1	-6.1	2.36844	2.77231	2	0.403869	0.666667	2.06667	1	0.666667	2.06667	1	1.4	6.3	8.6	2	2.3	8.5	5.8	3.08	2.99	0.118	1	12.92	0	5.03	1	0.8	0
1	1	2	46	2	0	2	0	38.57	1	Y	1	Y	0	Y	1	8.1	9.7	1.63	15.3	16.4	3	1.1	2.59487	3.5817	2	0.986833	5	3.63333	1	5	3.63333	2	-1.36667	6.2	8.2	2	2	7.4	5.8	3.17	2.34	0.34	0	2.9	0	4.78	1	1.08	1
1	1	1	61	1	0	10	1	25.92	2	Y	1	Y	0	N	0	7.9	8.4	0.51	13.2	8.2	2	-5	1.79801	2.93014	2	1.13212	2.56667	0.9	1	2.56667	0.9	1	-1.66667	5	5.5	2	0.5	11.3	11.1	3.85	4.2	0.1	1	0.58	1	6.04	0	1.77	1
1	1	2	71	1	0	10	1	22.04	3	N	0	Y	0	N	0	6.7	8.5	1.77	11.9	9.7	2	-2.2	2.05345	3.05193	2	0.998479	3.46667	1.86667	1	3.46667	1.86667	1	-1.6	6.3	4.4	2	-1.9	8.4	8.1	2.82	2.58	0.285	0	0.66	1	3.93	1	1.23	1
1	2	2	77	1	0	30	1	20.66	3	Y	1	Y	0	N	0	6	6.2	0.2	10.2	10	2	-0.2	2.85123	2.83347	2	-0.0177586	5.06667	3.66667	1	5.06667	3.66667	2	-1.4	7.8	6.5	2	-1.3	8.1	5.2	3.01	2.87	0.03	1	0.77	1	3.23	1	1.2	1
1	1	2	47	2	1	2	0	24.92	2	N	0	N	1	N	0	8.9	8	-0.97	12.8	10.8	2	-2	1.86177	2.9277	2	1.06593	3.2	2.9	1	3.2	2.9	2	-0.3	5.1	4.9	2	-0.2	8.6	7.9	3.03	2.44	0.113	1	3.52	0	4.22	1	0.66	0
1	2	1	54	2	0	28	1	22.77	3	Y	1	Y	0	N	0	4.3	5.7	1.42	11.8	9.5	2	-2.3	2.69311	2.58567	2	-0.107438	4.66667	2.53333	1	4.66667	2.53333	2	-2.13333	6.9	2.3	1	-4.6	12.2	9.8	2.87	1.62	1.368	0	1.86	0	8.25	0	1.29	1
1	2	2	60	2	1	1	0	21.09	3	N	0	Y	0	N	0	7.5	6.2	-1.33	10.6	7.3	1	-3.3	1.8936	2.74643	2	0.852828	3.13333	1.73333	1	3.13333	1.73333	1	-1.4	5.5	3.9	1	-1.6	8.2	7.8	2.71	2.17	0.031	1	0.95	1	4.02	1	1.05	1
1	2	2	46	2	0	7	1	27.64	2	N	0	N	1	N	0	8.3	7.7	-0.56	11	9.3	2	-1.7	1.81449	3.03315	2	1.21866	2.73333	1.63333	1	2.73333	1.63333	1	-1.1	5	4.2	1	-0.8	8.2	7.7	2.84	1.75	0.05	1	3	0	4.42	1	0.85	0
1	1	2	61	1	0	6	1	27.45	2	Y	1	Y	0	N	0	7.5	6.1	-1.37	10	6.2	1	-3.8	2.39573	2.60768	2	0.211951	4.5	2.66667	1	4.5	2.66667	2	-1.83333	5	5.2	2	0.2	7.1	6.3	2.68	2.48	0.044	1	2.25	0	4.6	1	1.09	1
1	1	2	52	2	1	3	0	26.31	2	Y	1	Y	0	N	0	9.2	7.7	-1.53	13.8	7.9	2	-5.9	2.01471	2.62679	2	0.612077	3.33333	0.566667	1	3.33333	0.566667	1	-2.76667	6.3	3	1	-3.3	6.7	6.5	2.34	2.75	0.008	1	6.38	0	3.52	1	0.95	0
1	2	1	53	2	0	8	1	28.91	1	N	0	Y	0	N	0	14.3	5.8	-8.46	15.8	7.9	2	-7.9	3.80826	2.6619	2	-1.14636	6.33333	1.8	1	6.33333	1.8	1	-4.53333	10.1	4	1	-6.1	8.2	7.8	3.4	3.07	0.323	0	1.07	1	4.71	1	1.85	1
1	1	2	65	1	0	7	1	21.01	3	N	0	Y	0	N	0	6.7	5.4	-1.32	16.7	7	1	-9.7	3.59093	2.57737	2	-1.01355	4.73333	1.7	1	4.73333	1.7	1	-3.03333	9.9	6.1	2	-3.8	9.5	9.1	2.15	2.31	0.068	1	0.92	1	3.56	1	1.03	0
1	1	2	62	1	0	10	1	25.61	2	N	0	Y	0	N	0	6.6	6.2	-0.38	11.1	9.7	2	-1.4	2.2416	2.75422	2	0.512619	3.86667	1.93333	1	3.86667	1.93333	1	-1.93333	6.4	2	1	-4.4	6.4	8.3	2.01	2.29	0.016	1	1.52	1	4	1	1.43	1
1	1	2	42	2	0	9	1	24.11	2	N	0	N	1	N	0	7.6	7.2	-0.49	12.3	9.2	2	-3.1	3.50258	2.9277	2	-0.574884	5.4	2.7	1	5.4	2.7	2	-2.7	8.8	5.6	2	-3.2	7.2	6.1	3.19	2.2	0.022	1	1.57	1	3.84	1	1.02	0
1	1	1	29	3	1	5	1	24.96	2	Y	1	N	1	N	0	11.8	9	-2.81	18.4	12.7	3	-5.7	3.55099	3.21381	2	-0.33718	4.46667	3.53333	1	4.46667	3.53333	2	-0.933333	9.2	6.1	2	-3.1	9.9	9.1	4.33	2.57	0.131	1	13.55	0	8.39	0	0.65	0
1	2	2	59	2	0	4	0	29.29	1	N	0	Y	0	N	0	8.1	5.9	-2.21	9.4	8.7	2	-0.7	3.90701	2.87849	2	-1.02852	5.9	2.26667	1	5.9	2.26667	2	-3.63333	12.4	3.3	1	-9.1	6.4	8.2	2.39	2.05	0.086	1	3.62	0	4.78	1	0.99	0
1	1	2	70	1	0	2	0	25.43	2	Y	1	Y	0	N	0	18.2	8.5	-9.74	11.9	10.9	2	-1	1.55747	3.00238	2	1.44491	1.7	2.36667	1	1.7	2.36667	2	0.666667	4.4	4.9	2	0.5	9.6	8.2	4.16	2.25	0.336	0	3.02	0	5.45	0	0.84	0
1	1	2	46	2	0	4	0	23.56	3	Y	1	Y	0	N	0	6.9	7.3	0.43	13.5	7.9	2	-5.6	2.02802	2.66726	2	0.639244	3.06667	0.4	1	3.06667	0.4	1	-2.66667	6	5.3	2	-0.7	6.6	8	1.87	1.89	0.15	0	2.78	0	2.56	1	0.72	0
1	1	2	50	2	0	5	1	22.57	3	Y	1	Y	0	N	0	6.1	7.7	1.65	12.5	8.8	2	-3.7	3.10683	2.93987	2	-0.166954	5.83333	3.6	1	5.83333	3.6	2	-2.23333	7.5	5.6	2	-1.9	6.5	6.9	2.12	1.95	0.28	0	1.67	1	3.85	1	0.71	0
1	1	2	80	1	0	28	1	25.06	2	Y	1	Y	0	N	0	7.8	6.4	-1.41	11.3	7.2	1	-4.1	3.5173	3	2	-0.517304	0.133333	0.9	1	0.133333	0.9	1	1.03333	10.8	6.2	2	-4.6	8.7	7.8	2.74	2.93	0.13	1	0.8	1	2.88	1	1.31	1
1	1	2	66	1	0	5	1	27.94	2	N	0	Y	0	N	0	8.5	7.3	-1.21	12.3	13.5	3	1.2	3.09015	3.05894	2	-0.0312086	4.33333	5	2	4.33333	5	2	0.666667	7.8	5.8	2	-2	7.7	8.7	2.92	2.18	0.02	1	2.59	0	4.99	1	1.15	1
1	2	1	27	3	0	12	1	34.55	1	Y	1	Y	0	N	0	9.4	6.4	-2.99	13.3	6.9	1	-6.4	2.69241	2.70185	2	0.00944567	3.26667	2.8	1	3.26667	2.8	2	-0.466667	8.2	9	2	0.8	9.9	9.3	2.64	1.76	0.07	1	4.76	0	4.63	1	1.2	1
1	1	1	50	2	0	5	1	26.7	2	N	0	Y	0	N	0	10.4	11.4	0.99	10.7	13.7	3	3	1.80963	3.49285	2	1.68322	2.8	2.66667	1	2.8	2.66667	2	-0.133333	5.3	7.8	2	2.5	9.2	6.5	3.72	2.23	0.05	1	3.26	0	5.64	0	0.8	0
1	2	2	52	2	0	8	1	26.23	2	N	0	N	1	N	0	9.7	9	0.01	13.5	12.7	3	-0.8	4.22013	3.38906	2	-0.831075	6.76667	0.3	1	6.76667	0.3	1	-6.46667	10.5	6.9	2	-3.6	8.1	6.7	2.05	2.26	0.04	1	0.94	1	4.12	1	1.16	1
1	2	1	40	2	0	6	1	28.28	1	N	0	Y	0	N	0	16.8	9.6	-7.2	18.1	12.1	3	-6	2.70792	3.1487	2	0.440771	3.53333	0.433333	1	3.53333	0.433333	1	-3.1	7.7	4.1	1	-3.6	12	7.8	2.62	1.76	0.14	1	1.06	1	4.02	1	1.44	1
1	1	2	77	1	0	1	0	24.1	2	N	0	N	1	N	0	6.9	6.4	-0.59	12.2	9.3	2	-2.9	1.71311	2.79285	2	1.07973	1.5	2.16667	1	1.5	2.16667	1	0.666667	5.2	8.6	2	3.4	7	5.7	2.22	1.86	0.05	1	1	1	4.26	1	1.35	1
1	2	1	58	2	0	2	0	29.38	1	Y	1	Y	0	N	0	11.5	5.8	-5.6	12.8	14.4	3	1.6	1.95095	3.308	2	1.35705	0.3	1.53333	1	0.3	1.53333	1	1.83333	5.5	6	2	0.5	9.1	7.5	2.55	2.02	0.02	1	1.32	1	3.6	1	1.05	1
1	2	2	49	2	0	1	0	25.39	2	N	0	Y	0	N	0	8.1	7.2	-0.87	11.1	10.3	2	-0.8	2.0966	3.0706	2	0.974002	2.6	1.4	1	2.6	1.4	1	-1.2	5.3	6.7	2	1.4	8.8	7.5	2.57	1.89	0.08	1	0.96	1	3.96	1	1.5	1
1	1	2	56	2	1	14	1	25.05	2	Y	1	Y	0	N	0	4.9	6.2	1.48	12.4	8.4	2	-4	2.5364	3.03315	2	0.496749	3.73333	2.56667	1	3.73333	2.56667	2	-1.16667	8.3	8	2	-0.3	7.1	8.4	2.53	3.01	0.2	0	1.5	1	3.58	1	1.04	1
1	2	2	35	3	0	7	1	27.4	2	Y	1	Y	0	N	0	9.3	6.7	-2.63	10.9	12.3	3	1.4	1.85151	2.95442	2	1.1029	1.23333	3.73333	1	1.23333	3.73333	2	2.5	5.4	6.9	2	1.5	11.8	13.3	3.81	3.39	0.11	1	2.16	0	3.91	1	0.77	0
1	1	2	50	2	1	8	1	29.76	1	Y	1	N	1	N	0	8	7.7	-0.33	13.7	12.6	3	-1.1	2.70432	2.94473	2	0.240411	2.23333	3.3	1	2.23333	3.3	2	1.06667	7.3	4.8	2	-2.5	9.7	9.2	3.13	1.76	0.13	1	1.47	1	5.53	0	0.96	0
1	1	1	49	2	0	5	1	24.4	2	N	0	Y	0	N	0	13.5	5.5	-7.98	19.4	9.4	2	-10	3.55762	2.75681	2	-0.800811	3.83333	3.86667	1	3.83333	3.86667	2	0.0333333	12	9.6	2	-2.4	15.2	13.8	2.82	1.9	0.19	0	1.25	1	3.15	1	0.88	0
1	2	1	59	2	0	1	0	34.05	1	Y	1	Y	0	N	0	19.5	8.3	-11.22	20	12.3	3	-7.7	3.94268	3.1053	2	-0.83739	5.86667	2.33333	1	5.86667	2.33333	2	-3.53333	10.2	5.4	2	-4.8	8.4	6.9	3.06	2.18	0.04	1	6.12	0	4.41	1	1.02	0
1	1	1	34	3	0	3	0	33.61	1	N	0	Y	0	N	0	7.9	7.3	-0.63	13.7	10.1	2	-3.6	2.17387	2.76715	2	0.593283	1.53333	0.733333	1	1.53333	0.733333	1	-0.8	6.9	2.2	1	-4.7	9	7.2	2.15	2.02	0.22	0	2.12	0	5.93	0	0.72	0
2	1	1	56	2	0	5	1	25.25	2	N	0	Y	0	Y	1	9.74	7	-2.74	20.2	11	2	-9.2	3.91018	3.31662	2	-0.593557	7.16667	3.6	1	7.16667	3.6	2	-3.56667	9.5	10	2	0.5	12.7	10.7	3.97	2.53	0.161	0	1.14	1	2.75	1	0.89	0
2	1	2	54	2	0	3	0	29.98	1	Y	1	Y	0	Y	1	6.5	7.7	1.2	12.5	10.1	2	-2.4	2.66324	3.17805	2	0.514808	4	1.83333	1	4	1.83333	1	-2.16667	6.8	4.4	2	-2.4	7.8	6.2	2.1	2	0.11	1	1.77	0	4.18	1	1.13	1
2	1	1	59	2	0	15	1	28.73	1	Y	1	Y	0	Y	1	9.53	8.5	-1.03	11.5	11.7	3	0.2	2.15318	3.42053	2	1.26734	2.9	3.13333	1	2.9	3.13333	2	0.233333	5.6	5.2	2	-0.4	10.1	9.8	2.07	3.1	0.11	1	0.89	1	3.52	1	1.53	1
2	1	2	59	2	0	2	0	24	2	Y	1	Y	0	Y	1	13.37	7.5	-5.87	13.5	15.9	3	2.4	4.19762	3.98748	2	-0.210138	4.43333	3.66667	1	4.43333	3.66667	2	-0.766667	12.3	8.4	2	-3.9	9.5	7.8	2.47	1.81	0.055	1	1.52	1	4.18	1	1.43	1
2	1	2	55	2	1	9	1	24.22	2	N	0	Y	0	Y	1	9.9	6	-3.9	21.2	13.2	3	-8	4.38938	3.63318	2	-0.756201	7.2	5	2	7.2	5	2	-2.2	12.2	7.4	2	-4.8	8.8	6.7	3.55	2.69	0.152	0	3.49	0	4.56	1	0.93	0
2	1	2	54	2	0	5	1	24.91	2	N	0	Y	0	Y	1	19.6	5.9	-13.7	18.4	7.8	1	-10.6	5.46408	2.79285	2	-2.67123	10.6	2.86667	1	10.6	2.86667	2	-7.73333	11.6	8.7	2	-2.9	11.7	7.8	1.76	2.73	0.031	1	0.92	1	3.86	1	0.68	0
2	1	1	44	2	1	5	1	22.74	3	Y	1	Y	0	N	0	6.71	6.4	-0.31	18	7.2	1	-10.8	3.75829	2.68328	2	-1.07501	5.63333	2.03333	1	5.63333	2.03333	1	-3.6	10.4	3.4	1	-7	7.4	6.2	2.54	2.38	0.054	1	5.92	0	5.66	0	0.65	0
2	1	2	46	2	0	2	0	25.01	2	N	0	N	1	Y	1	5.82	7	1.18	13.3	13.8	3	0.5	3.88967	3.71484	2	-0.174834	2.76667	5.03333	2	2.76667	5.03333	2	2.26667	11.8	7.1	2	-4.7	6.5	5.9	1.98	1.8	0.097	1	1.43	1	4.54	1	1.07	1
2	1	2	59	2	1	7	1	24.5	2	Y	1	Y	0	N	0	12.1	6.5	-5.6	14.2	11.4	3	-2.8	3.62833	3.37639	2	-0.251939	6.8	4.2	2	6.8	4.2	2	-2.6	8.2	6	2	-2.2	11.4	10	2.6	3.4	0.054	1	3.93	0	4.53	1	0.78	0
2	1	2	55	2	1	15	1	24.22	2	N	0	Y	0	Y	1	9.9	6	-3.9	21.2	8.8	2	-12.4	4.40335	2.96648	2	-1.43687	7.46667	1.8	1	7.46667	1.8	1	-5.66667	12.3	2.9	1	-9.4	8.8	10.1	3.55	2.69	0.152	0	3.49	0	4.56	1	0.93	0
2	1	2	54	2	1	5	1	24.91	2	N	0	Y	0	Y	1	19.6	6	-13.6	18.4	11.2	3	-7.2	5.26036	3.34664	2	-1.91372	10.2	6.9	2	10.2	6.9	2	-3.3	11.5	9.4	2	-2.1	11.7	6.2	1.76	2.73	0.031	1	0.92	1	3.86	1	0.68	0
2	1	2	46	2	0	2	0	25.01	2	N	0	N	1	Y	1	5.82	6.5	0.68	13.3	11.5	3	-1.8	1.71742	3.39116	2	1.67375	0.133333	5.03333	2	0.133333	5.03333	2	5.16667	5	6.4	2	1.4	6.5	8	1.98	1.8	0.097	1	1.43	1	4.54	1	1.07	1
2	2	1	64	1	0	15	1	23.83	3	N	0	Y	0	N	0	14.36	6.9	-7.46	17.1	12.9	3	-4.2	4.78808	3.59166	2	-1.19642	6.13333	4.86667	2	6.13333	4.86667	2	-1.26667	14.9	6.2	2	-8.7	10.9	8.9	3.03	2.85	0.057	1	2.87	0	4.16	1	0.83	0
2	1	2	52	2	0	10	1	27.76	2	N	0	Y	0	N	0	7.63	6.3	-1.33	18	7.3	1	-10.7	4.27746	2.70185	2	-1.57561	8.4	0.666667	1	8.4	0.666667	1	-7.73333	10.2	3.2	1	-7	7	6.2	2.52	2.5	0.08	1	2.48	0	2.58	1	0.62	0
2	2	1	55	2	0	10	1	33.87	1	N	0	Y	0	Y	1	8.68	7.7	-0.98	17.7	8.2	2	-9.5	3.01315	2.86356	2	-0.149582	4.83333	1.53333	1	4.83333	1.53333	1	-3.3	8.7	7.9	2	-0.8	9.8	8.9	3.03	2.85	0.063	1	1.29	1	3.34	1	1.18	1
2	1	1	60	2	0	7	1	24.06	2	N	0	Y	0	Y	1	9.53	7.1	-2.43	16.4	9.6	2	-6.8	5.59872	3.09839	2	-2.50034	7.46667	1.16667	1	7.46667	1.16667	1	-6.3	16.7	4.2	1	-12.5	12.8	11.2	3.01	1.7	0.087	1	1.37	1	6.62	0	1	0
2	2	2	57	2	0	20	1	30.26	1	Y	1	Y	0	Y	1	6.26	5.1	-1.16	17.8	7	1	-10.8	4.6292	2.64575	2	-1.98345	8.73333	2.1	1	8.73333	2.1	1	-6.63333	12.5	6.3	2	-6.2	8.1	7.8	2.55	1.76	0.041	1	1.69	1	3.34	1	1.57	1
2	1	2	47	2	0	5	1	26.57	2	N	0	Y	0	Y	1	7.36	5.7	-1.66	16.7	7.6	1	-9.1	3.41342	2.75681	2	-0.656609	4.86667	0.9	1	4.86667	0.9	1	-3.96667	9.1	2.9	1	-6.2	8.5	8.4	2.41	2.74	0.107	1	1.7	1	7.11	0	0.77	0
2	1	1	53	2	0	10	1	34.01	1	N	0	N	1	Y	1	4.83	5	0.17	11.4	5.9	1	-5.5	2.99158	2.42899	2	-0.562584	3.03333	1.83333	1	3.03333	1.83333	1	-1.2	8.6	3.3	1	-5.3	6.1	7.2	2.32	2.46	0.04	1	4.19	0	5.92	0	0.95	0
2	2	2	49	2	1	2	0	22.95	3	N	0	Y	0	Y	1	11.31	5.1	-6.21	18.1	12.5	3	-5.6	4.85038	3.53553	2	-1.31485	9.3	3.53333	1	9.3	3.53333	2	-5.76667	12.4	7.4	2	-5	11.3	8.5	3.84	2.56	0.044	1	0.86	1	3.88	1	1.28	1
2	1	1	74	1	1	15	1	30.67	1	Y	1	N	1	Y	1	7.6	3.6	-4	10.3	4.3	1	-6	2.4647	2.07364	2	-0.391059	4.26667	0.633333	1	4.26667	0.633333	1	-3.63333	5.3	3.8	1	-1.5	6.6	6	2.29	2.12	0.056	1	2.63	0	4.14	1	0.57	0
2	2	2	59	2	0	10	1	22.96	3	N	0	Y	0	Y	1	9.02	7.7	-1.32	18.4	8.9	2	-9.5	3.29487	2.98329	2	-0.311587	5.83333	1.1	1	5.83333	1.1	1	-4.73333	9.2	2.7	1	-6.5	8	7.6	3.17	2.8	0.035	1	1.52	1	4.58	1	1.15	1
2	1	2	65	1	0	20	1	23.7	3	N	0	Y	0	Y	1	4.72	6.7	1.98	20.1	13.4	3	-6.7	5.73581	3.6606	2	-2.07521	9.16667	2.7	1	9.16667	2.7	2	-6.46667	15.6	8.2	2	-7.4	7.5	7.5	2.59	1.72	0.055	1	0.53	1	3.89	1	1.55	1
2	1	2	49	2	0	10	1	23.71	3	Y	1	Y	0	Y	1	9.72	5.2	-4.52	16.6	9.8	2	-6.8	3.63547	3.1305	2	-0.504978	5.6	2.9	1	5.6	2.9	2	-2.7	9.4	4.6	2	-4.8	12	11.5	4.08	3.11	0.626	0	1.82	0	5.92	0	1.03	0
2	1	2	38	3	1	4	0	27.68	2	N	0	Y	0	Y	1	8.27	8.1	-0.17	18	8.8	2	-9.2	3.68575	2.96648	2	-0.719272	6.46667	0.933333	1	6.46667	0.933333	1	-5.53333	11	2	1	-9	7.8	7.5	2.78	2.25	0.011	1	1.36	1	4.87	1	1.42	1
2	1	2	47	2	0	7	1	26.17	2	N	0	Y	0	N	0	5.08	8.7	3.62	17.8	13.1	3	-4.7	3.71291	3.61939	2	-0.0935196	6.26667	4.43333	2	6.26667	4.43333	2	-1.83333	11.2	7.8	2	-3.4	7.7	7.2	2.38	2.11	0.001	1	1.99	0	5.01	1	0.92	0
2	1	1	50	2	1	8	1	22.84	3	N	0	Y	0	Y	1	9.07	10.7	1.63	19.3	13.8	3	-5.5	2.83415	3.71484	2	0.88069	4.93333	2.5	1	4.93333	2.5	2	-2.43333	7.9	4.9	2	-3	9	8.1	2.98	2.04	0.029	1	1.49	1	4.32	1	0.75	0
2	2	2	56	2	1	11	1	26.77	2	N	0	Y	0	Y	1	6.39	8.6	2.21	17.4	15	3	-2.4	3.88991	3.87298	2	-0.0169304	4.83333	3.26667	1	4.83333	3.26667	2	-1.56667	10.5	6.4	2	-4.1	6.8	10	2.63	2.47	0.036	1	2.44	0	3.52	1	0.85	0
2	1	2	52	2	0	10	1	28.72	1	N	0	Y	0	Y	1	6.83	6.2	-0.63	17.2	8.9	2	-8.3	4.89178	2.98329	2	-1.90849	9.26667	1.6	1	9.26667	1.6	1	-7.66667	11.2	5.2	2	-6	6.1	9.5	1.87	3.3	8.111	0	2.24	0	6.13	0	1.13	1
2	2	2	62	1	0	14	1	24.84	2	Y	1	Y	0	Y	1	5.95	7.5	1.55	19.3	11.8	3	-7.5	4.86719	3.43511	2	-1.43208	5.56667	3.4	1	5.56667	3.4	2	-2.16667	12.4	6.5	2	-5.9	6.8	7	2.33	2.5	0.009	1	3.06	0	4.05	1	1.05	1
2	1	2	55	2	0	4	0	25.38	2	Y	1	Y	0	Y	1	6.58	6.1	-0.48	13.9	11.3	3	-2.6	2.84454	3.36155	2	0.517004	5.46667	2.4	1	5.46667	2.4	2	-3.06667	7.4	5.2	2	-2.2	7.6	8.7	2.45	2.45	0.002	1	2.1	0	2.88	1	0.82	0
2	2	2	49	2	0	8	1	26.63	2	N	0	N	1	Y	1	19.93	9.3	-10.63	18.5	10.7	2	-7.8	3.27058	3.27109	2	0.000509555	2.53333	3.16667	1	2.53333	3.16667	2	0.633333	8.8	7.1	2	-1.7	10	8.9	2.51	1.93	0.044	1	4.18	0	3.55	1	0.75	0
2	2	1	59	2	0	25	1	26.22	2	Y	1	Y	0	Y	1	10.11	5.7	-4.41	24.2	7.9	2	-16.3	6.95078	2.81069	2	-4.14009	12.0667	3	1	12.0667	3	2	-9.06667	15.5	6.8	2	-8.7	9.2	7.8	2.64	2.35	2.246	0	1.41	1	5.03	1	1.12	1
2	1	1	56	2	0	6	1	32	1	Y	1	Y	0	Y	1	14.53	6.7	-7.83	20.8	13.7	3	-7.1	5.0659	3.70135	2	-1.36455	9.36667	4.83333	2	9.36667	4.83333	2	-4.53333	11.5	10	2	-1.5	13.2	12.7	3.66	4.92	0.589	0	1.64	1	5.24	0	0.94	0
2	2	2	64	1	0	8	1	21.64	3	Y	1	Y	0	Y	1	7.86	8	0.14	18.7	11.8	3	-6.9	5.90532	3.43511	2	-2.47021	10.3333	3.16667	1	10.3333	3.16667	2	-7.16667	16.3	5.7	2	-10.6	10.1	8.9	3.3	2.71	0.012	1	2.08	0	5.79	0	0.94	0
2	2	2	52	2	1	5	1	21.88	3	Y	1	N	1	Y	1	6.51	6.1	-0.41	13.8	12.2	3	-1.6	2.65635	3.49285	2	0.836501	4.8	3.5	1	4.8	3.5	2	-1.3	6.8	6.1	2	-0.7	8.3	7.8	3.1	2.68	0.041	1	1.03	1	4.51	1	1.49	1
2	2	1	77	1	1	6	1	31.25	1	Y	1	Y	0	Y	1	8.22	5.8	-2.42	12.3	8.8	2	-3.5	2.22988	2.96648	2	0.736596	3.66667	2.36667	1	3.66667	2.36667	2	-1.3	6.5	3.2	1	-3.3	7.8	6.6	3.02	3.35	0.035	1	1.44	1	5.17	1	1.15	1
2	1	2	59	2	1	10	1	33.26	1	Y	1	Y	0	Y	1	7.07	7.4	0.33	9.1	9.3	2	0.2	1.07924	3.04959	2	1.97035	1.86667	1	1	1.86667	1	1	-0.866667	2.5	3	1	0.5	7.1	6.9	2.79	2.05	0.048	1	1.76	0	5.71	0	1.03	0
2	1	2	55	2	1	9	1	21.67	3	N	0	N	1	N	0	11.52	7.8	-3.72	25.1	14.1	3	-11	5.33649	3.755	2	-1.58149	9	4.06667	2	9	4.06667	2	-4.93333	13.9	8.1	2	-5.8	12.6	11.3	3.6	2.35	0.115	1	1.56	1	3.48	1	0.64	0
2	2	2	71	1	0	13	1	25.71	2	N	0	Y	0	Y	1	8.31	5.4	-2.91	14.7	14.6	3	-0.1	2.07514	3.82099	2	1.74586	1.96667	6.8	2	1.96667	6.8	2	4.83333	4.8	9.2	2	4.4	7.7	7.7	2.63	2.1	0.171	0	2.22	0	3.58	1	0.98	0
2	1	1	49	2	0	11	1	28.4	1	Y	1	Y	0	Y	1	10.41	7.4	-3.01	14.3	12.4	3	-1.9	3.53479	3.52136	2	-0.0134297	5.66667	2.93333	1	5.66667	2.93333	2	-2.73333	10.4	6.6	2	-3.8	10.8	9.5	3.9	2.89	0.313	0	10.68	0	5.39	0	1.05	1
2	2	2	38	3	0	8	1	24.53	2	N	0	N	1	Y	1	9.74	8.8	-0.94	28.2	21.8	3	-6.4	6.0492	4.66905	2	-1.38016	9.43333	6.7	2	9.43333	6.7	2	-2.73333	18	13.1	2	-4.9	12.8	11.3	2.15	2.31	0.033	1	1.12	1	3.44	1	1.48	1
2	1	1	53	2	0	6	1	27.68	2	N	0	N	1	Y	1	7.59	7	-0.59	13	8.5	2	-4.5	3.20817	2.91548	2	-0.292698	4.96667	3.13333	1	4.96667	3.13333	2	-1.83333	8.6	5.2	2	-3.4	7.9	7.6	1.99	1.81	0.022	1	2.34	0	4.25	1	1.08	1
2	2	2	74	1	0	13	1	23.56	3	Y	1	Y	0	Y	1	5.69	5.2	-0.49	18.8	7.9	2	-10.9	2.87112	2.81069	2	-0.0604267	4.63333	2.26667	1	4.63333	2.26667	2	-2.36667	8.8	5.4	2	-3.4	10.3	9.6	2.15	2.7	0.111	1	1.83	0	4.69	1	1.01	0
2	1	2	41	2	1	6	1	25.47	2	Y	1	Y	0	Y	1	8.86	6.9	-1.96	8.9	8.5	2	-0.4	1.14268	2.91548	2	1.7728	1.33333	0.633333	1	1.33333	0.633333	1	-0.7	3.2	1.6	1	-1.6	9.3	9.2	2.39	2.12	0.101	1	0.78	1	2.29	1	1.12	1
2	1	1	43	2	0	12	1	22.39	3	N	0	N	1	N	0	13.3	8	-5.3	24.2	9.3	2	-14.9	4.46521	3.04959	2	-1.41562	5.7	1.86667	1	5.7	1.86667	1	-3.83333	13.2	5.2	2	-8	13.1	8.9	4.06	2.25	0.007	1	1.65	1	4.72	1	0.89	0
2	1	2	63	1	0	16	1	25.95	2	N	0	Y	0	Y	1	7.78	8.6	0.82	18	10.5	2	-7.5	4.04216	3.24037	2	-0.801788	4.3	1.83333	1	4.3	1.83333	1	-2.46667	11.7	5.7	2	-6	6.31	6.1	2.58	2.36	0.124	1	3.52	0	5.4	0	0.86	0
2	2	1	51	2	0	5	1	25.16	2	N	0	N	1	N	0	8.43	7	-1.43	14.4	11.7	3	-2.7	3.07013	3.42053	2	0.350394	4.83333	2.5	1	4.83333	2.5	2	-2.33333	7.8	6.4	2	-1.4	10.3	9.3	2.41	2.45	0.016	1	2.3	0	5.05	1	1.23	1
2	2	2	52	2	1	10	1	23.56	3	N	0	N	1	Y	1	16.3	5.9	-10.4	23.8	9.7	2	-14.1	3.99208	3.11448	2	-0.877593	5.8	3.06667	1	5.8	3.06667	2	-2.73333	12.1	5.8	2	-6.3	11.9	10.5	4.68	3.71	0.015	1	2.85	0	6.09	0	1.17	1
2	2	2	54	2	0	10	1	21.09	3	N	0	N	1	Y	1	11.47	7.8	-3.67	17.5	17.8	3	0.3	4.85058	4.219	2	-0.631572	9.06667	5.6	2	9.06667	5.6	2	-3.46667	12.4	10	2	-2.4	8.1	7.8	3.18	2.25	0.076	1	2.37	0	4.14	1	1.37	1
2	2	1	53	2	0	11	1	28.31	1	Y	1	Y	0	Y	1	8.21	4.8	-3.41	18.1	9.4	2	-8.7	3.44909	3.06594	2	-0.383144	4.7	2.93333	1	4.7	2.93333	2	-1.76667	9.7	10.6	2	0.9	10.1	8.6	3.4	2.24	0.116	1	2.42	0	4.1	1	1.06	1
2	2	1	64	1	0	4	0	27.34	2	Y	1	Y	0	Y	1	9.16	6.5	-2.66	18.2	10.1	2	-8.1	5.14666	3.17805	2	-1.96861	9.66667	3.36667	1	9.66667	3.36667	2	-6.3	11.2	4.1	1	-7.1	10.2	9.5	2.92	2.61	0.277	0	2.37	0	8.96	0	9.16	1
2	1	2	44	2	1	13	1	27.76	2	Y	1	Y	0	Y	1	11.64	7.9	-3.74	15.6	14.8	3	-0.8	2.85115	3.84708	2	0.995928	4.7	5.2	2	4.7	5.2	2	0.5	8.2	7.5	2	-0.7	7.7	7.2	2.73	1.79	0.021	1	4.74	0	5.04	1	1.44	1
2	1	2	71	1	0	15	1	25.1	2	Y	1	Y	0	Y	1	8.65	7	-1.65	16.8	9.2	2	-7.6	3.3563	3.03315	2	-0.323152	5.93333	2.73333	1	5.93333	2.73333	2	-3.2	8.7	4.3	1	-4.4	9.2	8.6	2.44	3.35	0.003	1	0.98	1	1.01	1	0.98	0
2	1	2	55	2	0	30	1	20.28	3	N	0	Y	0	Y	1	5.96	9.4	3.44	12.8	11	2	-1.8	1.95095	3.31662	2	1.36568	2.43333	4.86667	2	2.43333	4.86667	2	2.43333	5.9	9.8	2	3.9	12	10.8	2.49	3.3	0.046	1	1.23	1	4.43	1	1.18	1
2	2	2	61	1	0	12	1	26.72	2	N	0	Y	0	Y	1	9.6	9.2	-0.4	18.7	9.9	2	-8.8	4.586	3.14643	2	-1.43958	6.76667	0.766667	1	6.76667	0.766667	1	-6	11.2	1.5	1	-9.7	8.3	6.9	2.24	2.01	0.006	1	1.01	1	4.89	1	1.66	1
2	1	2	77	1	0	17	1	23.24	3	N	0	Y	0	Y	1	6.92	8.9	1.98	11.3	10.9	2	-0.4	1.98278	3.30151	2	1.31873	2.46667	1.63333	1	2.46667	1.63333	1	-0.833333	5.9	6.7	2	0.8	6.8	6.2	2.73	2.35	0.102	1	0.78	1	4.96	1	1.24	1
2	1	2	40	2	1	8	1	23.36	3	N	0	N	1	Y	1	9.28	7.8	-1.48	19.8	8.4	2	-11.4	4.5046	2.89828	2	-1.60633	8.3	0.566667	1	8.3	0.566667	1	-7.73333	12.1	3.9	1	-8.2	9.5	8.4	3.99	3.59	0.211	0	0.98	1	3.92	1	1.26	1
2	1	2	69	1	0	5	1	22.1	3	N	0	Y	0	Y	1	8.35	7.2	-1.15	17.8	14.6	3	-3.2	4.81575	3.82099	2	-0.994753	8.76667	3.23333	1	8.76667	3.23333	2	-5.53333	10.4	9	2	-1.4	7.4	6.3	3.09	2.79	0.005	1	0.9	1	3.35	1	2.11	1
2	1	2	57	2	0	19	1	22.1	3	N	0	Y	0	Y	1	17.05	6.6	-10.45	10.5	11.3	3	0.8	4.65081	3.36155	2	-1.28926	6.16667	5.53333	2	6.16667	5.53333	2	-0.633333	11.2	8.5	2	-2.7	11.1	10.5	3.57	3.01	0.058	1	1.13	1	4.49	1	1.47	1
2	2	1	46	2	1	6	1	23.94	3	N	0	N	1	Y	1	7.92	8	0.08	19.8	12.7	3	-7.1	4.02113	3.56371	2	-0.457429	5.73333	5.26667	2	5.73333	5.26667	2	-0.466667	11.6	7.8	2	-3.8	7.6	7.8	2.63	2.44	0.024	1	5.33	0	4.38	1	0.68	0
2	1	1	59	2	0	19	1	24.58	2	Y	1	Y	0	Y	1	17.84	5.1	-12.74	18.3	7.8	1	-10.5	2.9977	2.79285	2	-0.20485	5.43333	1.7	1	5.43333	1.7	1	-3.73333	7.4	8.7	2	1.3	17.3	12.3	3.07	2.77	0.899	0	4.56	0	6.05	0	1.15	1
2	2	2	64	1	0	10	1	24.88	2	Y	1	N	1	Y	1	4.61	5.7	1.09	15.7	12.9	3	-2.8	3.59418	3.59166	2	-0.00251818	6.8	3.6	1	6.8	3.6	2	-3.2	9.4	7.6	2	-1.8	7.2	6.9	3.43	2.94	0.032	1	0.76	1	4.24	1	2.03	1
2	1	2	58	2	0	1	0	26.93	2	N	0	N	1	Y	1	19.08	5.4	-13.68	14.4	15	3	0.6	4.04593	3.87298	2	-0.172943	5.26667	5.83333	2	5.26667	5.83333	2	0.566667	9.7	9.6	2	-0.1	11.8	9.1	6.54	4.55	0.045	1	19.36	0	8.1	0	1.32	1
2	1	2	67	1	0	16	1	31.55	1	Y	1	Y	0	Y	1	9.41	6.4	-3.01	20.6	9.3	2	-11.3	4.12466	3.04959	2	-1.07507	3.7	4.2	2	3.7	4.2	2	0.5	11.1	6.9	2	-4.2	12	10.6	3.46	2.77	0.079	1	5.37	0	3.53	1	0.7	0
2	1	1	57	2	0	7	1	25.61	2	N	0	Y	0	Y	1	12.67	8.1	-4.57	17.2	13	3	-4.2	4.1378	3.60555	2	-0.532254	5.26667	2.43333	1	5.26667	2.43333	2	-2.83333	11.1	6.6	2	-4.5	10.1	9.5	2.96	2.6	0.128	1	2.6	0	3.53	1	0.88	0
2	2	1	72	1	0	10	1	26.29	2	Y	1	Y	0	Y	1	5.71	6.4	0.69	15.3	12.9	3	-2.4	5.03946	3.59166	2	-1.44781	7.53333	4.46667	2	7.53333	4.46667	2	-3.06667	12.6	7.9	2	-4.7	12.2	8	3.08	2.7	0.009	1	1.76	0	4.34	1	1.06	1
2	1	1	43	2	1	13	1	26.23	2	N	0	Y	0	Y	1	10.33	8.5	-1.83	18.2	11	2	-7.2	4.51358	3.31662	2	-1.19695	6.4	6.76667	2	6.4	6.76667	2	0.366667	11.7	11.3	2	-0.4	7.8	7.7	2.43	2.39	0.024	1	3.01	0	4.38	1	1.17	1
2	2	2	53	2	0	23	1	23.14	3	Y	1	N	1	Y	1	5.97	7	1.03	19.6	8.4	2	-11.2	4.68346	2.89828	2	-1.78518	7.06667	1.5	1	7.06667	1.5	1	-5.56667	12.9	11.7	2	-1.2	7.4	7.7	2.98	3.19	0.045	1	1.4	1	6.77	0	1.78	1
2	1	2	42	2	1	5	1	26.12	2	Y	1	N	1	N	0	18.63	6.6	-12.03	20	12.3	3	-7.7	4.58891	3.50714	2	-1.08177	4.16667	2.26667	1	4.16667	2.26667	2	-1.9	13.1	6.6	2	-6.5	11.7	7.8	4.95	3.22	0.033	1	3.96	0	3.18	1	0.75	0
2	1	2	52	2	0	13	1	21.26	3	N	0	Y	0	Y	1	6.45	5.7	-0.75	12.8	7.1	1	-5.7	2.22015	2.66458	2	0.444437	4.1	3.1	1	4.1	3.1	2	-1	5.5	11.7	2	6.2	8.7	7.6	3.1	3.35	0.21	0	3.04	0	4.05	1	0.69	0
2	1	1	51	2	0	5	1	29.73	1	N	0	Y	0	Y	1	4.63	6.3	1.67	10.4	11.1	2	0.7	3.25049	3.33167	2	0.0811718	4.93333	2.16667	1	4.93333	2.16667	1	-2.76667	9.9	5.6	2	-4.3	7.8	5.9	4.47	2.43	0.075	1	1.08	1	3.05	1	0.98	0
2	1	1	39	3	0	5	1	24.97	2	N	0	N	1	N	0	7.01	7.7	0.69	18.4	9.3	2	-9.1	4.10261	3.04959	2	-1.05302	7.23333	3.93333	2	7.23333	3.93333	2	-3.3	10.3	8.3	2	-2	9.1	8.7	3.44	2.75	0.086	1	4.58	0	4.73	1	0.71	0
2	2	2	68	1	0	11	1	25.3	2	Y	1	N	1	Y	1	9.07	8.4	-0.67	18.9	13.8	3	-5.1	5.14189	3.71484	2	-1.42706	7.1	4.5	2	7.1	4.5	2	-2.6	13.9	7	2	-6.9	10.5	9.6	3.25	2.44	0.126	1	1.82	0	5.06	1	0.94	0
2	1	1	50	2	0	10	1	25.71	2	Y	1	Y	0	Y	1	7.01	6.7	-0.31	17.8	10.9	2	-6.9	3.88991	3.30151	2	-0.588399	6.16667	2.3	1	6.16667	2.3	2	-3.86667	11	4.6	2	-6.4	7.5	6.7	3.24	1.85	0.182	0	2.42	0	1.05	1	1.06	1
2	2	2	39	3	1	8	1	23.43	3	Y	1	N	1	Y	1	9.85	7.1	-2.75	16.2	8.3	2	-7.9	3.49176	2.88097	2	-0.610787	6.3	2.13333	1	6.3	2.13333	1	-4.16667	9.2	4.4	2	-4.8	7.7	6.7	3.1	2.29	0.014	1	4.17	0	4.5	1	0.94	0
2	1	2	64	1	0	30	1	24.62	2	N	0	Y	0	Y	1	9.31	5.5	-3.81	9.8	13.2	3	3.4	2.15019	3.63318	2	1.48299	1.5	4.03333	2	1.5	4.03333	2	2.53333	6.1	7.7	2	1.6	7.2	6.9	1.96	2.12	0.072	1	1.05	1	3.22	1	1.44	1
2	1	2	62	1	0	22	1	26.08	2	Y	1	Y	0	Y	1	5.41	5.7	0.29	18.3	11	2	-7.3	4.142	3.31662	2	-0.825378	7.2	2.36667	1	7.26667	2.36667	2	-4.9	12	6	2	-6	7.1	7.1	3.08	2.33	0.075	1	1.42	1	5.46	0	1.07	1
2	1	1	48	2	0	3	0	35.44	1	N	0	N	1	Y	1	14.78	8.5	-6.28	20.1	11	2	-9.1	2.70273	3.31662	2	0.613892	4.2	4.23333	2	4.2	4.23333	2	0.0333333	7	18.9	2	11.9	10.8	7.3	3.77	2.83	0.052	1	7.16	0	5.1	1	0.51	0
2	2	2	66	1	0	9	1	27.24	2	Y	1	Y	0	N	0	4.59	7.2	2.61	17.7	9.5	2	-8.2	3.59258	3.08221	2	-0.510378	4.4	1.96667	1	4.4	1.96667	1	-2.43333	11.4	3.1	1	-8.3	7.1	5.9	2.58	2.43	0.098	1	2.32	0	1.3	1	1.3	1
2	1	2	52	2	0	13	1	27.68	2	Y	1	Y	0	Y	1	8.83	6.9	-1.93	18.4	11.1	2	-7.3	4.07425	3.33167	2	-0.742585	5.3	2.3	1	5.3	2.3	2	-3	10.7	4.4	2	-6.3	9	8.8	3.81	2.15	0.133	1	2.77	0	5.03	1	1	0
2	1	1	49	2	0	8	1	28.33	1	N	0	N	1	Y	1	12.4	7.5	-4.9	23.6	12.6	3	-11	5.03743	3.54965	2	-1.48778	8	3.8	1	8	3.8	2	-4.2	11.9	6.1	2	-5.8	10.2	7.8	4.08	2.25	0.004	1	0.86	1	4.09	1	1.67	1
2	2	2	41	2	0	1	0	22.43	3	N	0	N	1	Y	1	14.16	7	-7.16	20.7	8.8	2	-11.9	4.43573	2.96648	2	-1.46925	5.83333	1.86667	1	5.83333	1.86667	1	-3.96667	13.5	3.7	1	-9.8	10.2	9.4	3.55	2.83	0.122	1	1.14	1	5.13	1	1.4	1
2	1	2	61	1	0	12	1	27.74	2	N	0	Y	0	Y	1	7.48	7.5	0.02	20.4	9.7	2	-10.7	4.24802	3.11448	2	-1.13354	5.96667	3.36667	1	5.96667	3.36667	2	-2.6	12.9	6.2	2	-6.7	8.7	6.9	3.26	2.77	0.057	1	1.45	1	3.34	1	0.78	0
2	1	2	46	2	1	3	0	23.66	3	N	0	N	1	N	0	17.32	8.4	-8.92	14.8	12.2	3	-2.6	2.09159	3.49285	2	1.40126	1.53333	3.8	1	1.53333	3.8	2	2.26667	6.5	9.5	2	3	13.8	10.3	4.12	2.99	0.139	1	4.42	0	3.22	1	0.68	0
2	1	2	54	2	1	11	1	25.04	2	Y	1	Y	0	Y	1	5.54	5.8	0.26	15	15.7	3	0.7	3.69717	3.96232	2	0.265155	5.33333	5.03333	2	5.33333	5.03333	2	-0.3	10.9	12.6	2	1.7	6.7	5.6	2.24	2.49	0.014	1	0.91	1	2.49	1	0.72	0
2	1	1	48	2	0	5	1	24.56	2	N	0	N	1	N	0	16.21	7.7	-8.51	30.2	11.2	3	-19	11.0196	3.34664	2	-7.67295	10.5	1.43333	1	10.5	1.43333	1	-9.06667	28.6	4.5	2	-24.1	11.1	10	4.25	2.42	0.009	1	5.57	0	4.83	1	0.56	0
2	1	2	79	1	1	20	1	23.03	3	Y	1	Y	0	Y	1	10.5	6.6	-3.9	13.7	9.7	2	-4	4.44126	3.11448	2	-1.32677	6.56667	2.36667	1	6.56667	2.36667	2	-4.2	14.1	7.2	2	-6.9	11.1	8.4	3.77	3.13	0.251	0	1.08	1	4.3	1	1.18	1
2	1	2	63	1	0	15	1	30.12	1	Y	1	Y	0	Y	1	6.16	7.6	1.44	18.5	17	3	-1.5	5.01488	4.12311	2	-0.891777	8.56667	4.93333	2	8.56667	4.93333	2	-3.63333	13	11.2	2	-1.8	7.8	6.5	2.88	2.36	0.053	1	1.08	1	3.27	1	1.24	1
2	1	1	45	2	0	10	1	29.76	1	N	0	Y	0	Y	1	12.98	8.4	-4.58	21.2	13.2	3	-8	3.72373	3.63318	2	-0.090553	4.73333	3.96667	2	4.73333	3.96667	2	-0.766667	10.1	10.7	2	0.6	8.9	8.5	3.66	2.87	0.132	1	6.42	0	5.45	0	0.76	0
2	2	1	68	1	0	30	1	23.62	3	N	0	Y	0	N	0	6.27	5.6	-0.67	12.5	8.5	2	-4	1.7385	2.91548	2	1.17698	2.33333	3.03333	1	2.33333	3.03333	2	0.7	4.9	8.4	2	3.5	10	9.9	3.56	3.62	0.094	1	1.08	1	2.94	1	1.18	1
2	1	1	49	2	1	10	1	20.43	3	N	0	Y	0	N	0	8.28	7.7	-0.58	23.9	8.9	2	-15	6.52008	2.98329	2	-3.53679	9.56667	0.8	1	9.56667	0.8	1	-8.76667	15.5	7.5	2	-8	8	6.2	3.05	2.35	0.079	1	2.01	0	4.76	1	1.36	1
2	1	2	61	1	0	14	1	28.7	1	Y	1	Y	0	Y	1	9.1	9.8	0.7	21.8	13.3	3	-8.5	5.848	3.64692	2	-2.20108	8.53333	3.86667	1	8.53333	3.86667	2	-4.66667	15.2	6	2	-9.2	7.6	7.2	3.17	3.79	0.08	1	1.36	1	2.37	1	0.96	0
2	2	2	68	1	0	8	1	26.22	2	Y	1	Y	0	Y	1	8.01	6.3	-1.71	18	9.7	2	-8.3	4.7391	3.11448	2	-1.62462	8.7	3.46667	1	8.7	3.46667	2	-5.23333	11.7	7.3	2	-4.4	8.3	7.9	3.37	2.41	0.077	1	1.87	0	4.48	1	1.36	1
2	2	2	71	1	1	19	1	23.88	3	Y	1	N	1	Y	1	4.98	8.2	3.22	11.8	8.5	2	-3.3	1.66819	2.91548	2	1.24729	2.6	1	1	2.6	1	1	-1.6	4.6	3.2	1	-1.4	8.7	8.3	3.4	2.63	0.086	1	0.9	1	3.65	1	1.12	1
2	2	1	63	1	0	11	1	27.34	2	Y	1	Y	0	Y	1	14.59	6.3	-8.29	15.3	10.2	2	-5.1	4.57582	3.19374	2	-1.38207	5.8	3.76667	1	5.8	3.76667	2	-2.03333	12	9.4	2	-2.6	9.2	8.9	2.4	3.44	0.061	1	0.93	1	4.46	1	1.41	1
2	1	2	71	1	0	8	1	28.07	1	Y	1	Y	0	Y	1	5.88	7.4	1.52	11.4	13	3	1.6	3.3778	3.60555	2	0.227753	4.03333	3.23333	1	4.03333	3.23333	2	-0.8	9.6	6.7	2	-2.9	7.1	6.9	2.95	2.4	0.177	0	3.85	0	6.34	0	1.05	1
2	1	2	54	2	0	8	1	31.11	1	Y	1	Y	0	N	0	7.32	6.7	-0.62	13.2	8.5	2	-4.7	3.01978	2.91548	2	-0.1043	5.4	1.5	1	5.4	1.5	1	-3.9	7.7	3.5	1	-4.2	7.1	9.9	1.9	2.39	0.039	1	1.61	1	2.47	1	1.32	1
2	1	2	49	2	0	8	1	25.69	2	N	0	Y	0	N	0	5.84	7.8	1.96	12.2	9.4	2	-2.8	3.36048	3.06594	2	-0.294543	2.06667	0.733333	1	2.06667	0.733333	1	-2.8	7.8	3.9	1	-3.9	7.5	6.7	2.05	2.67	0.032	1	2.63	0	3.77	1	1.37	1
2	2	1	68	1	1	21	1	35.06	1	Y	1	Y	0	N	0	6.88	9.9	3.02	10.5	18.6	3	8.1	2.3999	4.31277	2	1.91287	2.7	4.5	2	2.7	4.5	2	1.8	7.1	15	2	7.9	13.7	10.5	4.81	2.3	0.107	1	1.72	0	3.8	1	0.9	0
2	2	2	48	2	0	1	0	22.43	3	N	0	N	1	Y	1	13.3	5.5	-7.8	18.9	8.2	2	-10.7	4.40849	2.86356	2	-1.54492	3.6	0.533333	1	3.6	0.533333	1	-3.06667	12.5	4.5	2	-8	11.5	8.5	4.31	1.8	0.266	0	0.98	1	5.57	0	1.78	1
2	1	2	58	2	0	2	0	30.12	1	Y	1	Y	0	Y	1	18.44	6.7	-11.74	24.4	9.8	2	-14.6	4.93684	3.1305	2	-1.80634	2.5	3.06667	1	2.5	3.06667	2	0.566667	13.6	8	2	-5.6	10.1	6	4	1.98	0.093	1	2.67	0	5.07	1	0.74	0
2	1	2	49	2	0	11	1	24.5	2	Y	1	Y	0	N	0	15.48	11.3	-4.18	16.4	14.1	3	-2.3	2.43242	3.755	2	1.32258	3.6	2.86667	1	3.6	2.86667	2	-0.733333	7	4	1	-3	10.7	8.7	4.45	2.33	0.11	1	2.91	0	3.22	1	0.74	0
2	2	2	51	2	0	4	0	24	2	N	0	N	1	Y	1	7.41	7.7	0.29	17.9	12.3	3	-5.6	4.22769	3.50714	2	-0.720551	4.93333	5.56667	2	4.93333	5.56667	2	0.633333	12.7	12.3	2	-0.4	6.9	7.5	3	3.27	0.03	1	1.94	0	3.42	1	0.79	0
2	1	2	52	2	0	5	1	29.05	1	N	0	N	1	N	0	6.87	8.3	1.43	10.4	12.3	3	1.9	1.00783	3.50714	2	2.49931	0.133333	3.26667	1	0.133333	3.26667	2	3.13333	3.1	8	2	4.9	8.9	7.2	3.1	2.54	0.06	1	1.89	0	3.9	1	0.73	0
2	1	1	64	1	1	7	1	25.01	2	Y	1	Y	0	Y	1	5.76	6.4	0.64	12.5	11.8	3	-0.7	3.49605	3.43511	2	-0.0609394	4.53333	2.56667	1	4.53333	2.56667	2	-1.96667	9.6	5.4	2	-4.2	6.3	9.1	1.7	2.67	0.11	1	1.11	1	3.48	1	0.87	0
2	2	2	52	2	0	9	1	23.43	3	Y	1	N	1	N	0	10.51	8.9	-1.61	14.8	7.8	2	-7	2.67831	2.79285	2	0.11454	1.36667	1.86667	1	1.36667	1.86667	1	0.5	6.7	13	2	6.3	8.2	6.5	2.34	1.95	0.05	1	1.36	1	4.05	1	1.44	1
2	2	1	54	2	0	3	0	30.86	1	Y	1	N	1	N	0	9.07	7.7	-1.37	11.5	13	3	1.5	3.48971	3.60555	2	0.115839	6	3.63333	1	6	3.63333	2	-2.36667	10.1	5.7	2	-4.4	8.8	8.1	3.05	2.29	0.26	0	1.92	0	4.23	1	0.94	0
2	1	2	59	2	0	7	1	20.76	3	N	0	N	1	N	0	8.1	8	-0.1	7	10.1	2	3.1	3.16326	3.17805	2	0.0147934	3.23333	4.4	2	3.23333	4.4	2	1.16667	8.4	8.4	2	0	7.5	10	3.76	3	0.17	0	0.83	1	4.52	1	1.46	1
2	2	2	49	2	0	3	0	25	2	N	0	Y	0	Y	1	9.46	4.4	-5.06	10.9	6.6	1	-4.3	2.30197	2.56905	2	0.26708	3.03333	1	1	3.03333	1	1	-2.03333	6	3.5	1	-2.5	10	9.5	2.64	2.55	1.273	0	2.37	0	5.3	0	1.67	1
2	1	2	68	1	1	4	0	25.39	2	Y	1	Y	0	N	0	7.15	6.9	-0.25	13.2	12.8	3	-0.4	3.78172	3.57771	2	-0.204014	3.9	1.2	1	3.9	1.2	1	-2.7	12.2	6.3	2	-5.9	8.4	7	2.13	1.87	0.07	1	0.89	1	2.54	1	1.16	1
2	1	2	55	2	1	10	1	23.26	3	N	0	N	1	N	0	6.94	7	0.06	18.6	11.8	3	-6.8	5.10635	3.43511	2	-1.67123	9.86667	2.46667	1	9.86667	2.46667	2	-7.4	13.2	6.2	2	-7	7.2	6.5	2.18	1.98	0.01	1	1.31	1	3.88	1	1.58	1
2	1	2	46	2	0	2	0	22.15	3	Y	1	N	1	Y	1	3.2	5.6	1.4	13.8	10.3	2	-3.5	3.37533	3.20936	2	-0.165969	5.6	7.13333	2	5.6	7.13333	2	1.53333	8.2	14.5	2	6.3	7.6	7.3	1.65	2.13	0.094	1	2.89	0	7.72	0	1.5	1
2	2	2	53	2	0	4	0	23.03	3	Y	1	Y	0	N	0	10.27	7.4	-2.87	14.6	9.8	2	-4.8	3.95282	3.1305	2	-0.822322	5.36667	3.06667	1	5.36667	3.06667	2	-2.3	11.4	6.6	2	-4.8	9	7.8	1.93	1.83	0.082	1	1.78	0	2.78	1	1.23	1
2	1	1	52	2	0	1	0	26.12	2	Y	1	Y	0	N	0	6.71	6.4	-0.31	16.8	7.7	1	-9.1	3.55889	2.77489	2	-0.784005	5.6	3.8	1	5.6	3.8	2	-1.8	8.8	9.1	2	0.3	8.2	7.7	2.3	1.99	0.149	1	1.07	1	4.07	1	0.86	0
2	2	2	45	2	0	9	1	27.26	2	Y	1	N	1	N	0	9.48	8.9	-0.58	14.9	10.2	2	-4.7	3.18209	3.19374	2	0.0116511	5.23333	1.3	1	5.23333	1.3	1	-3.93333	8.7	3.5	1	-5.2	9.1	6.9	2.83	2.74	0.146	1	3.35	0	3.79	1	1.02	0
2	2	2	53	2	0	4	0	22.03	3	Y	1	Y	0	Y	1	10.27	7.4	-2.87	14.6	9.8	2	-4.8	4.517	3.1305	2	-1.38651	7.4	3.06667	1	7.4	3.06667	2	-4.33333	11.9	6.6	2	-5.3	9	7.9	1.93	1.83	0.15	0	1.78	0	2.78	1	1.23	1
2	2	2	56	2	0	15	1	25.71	2	Y	1	Y	0	N	0	8.16	5.6	-2.56	12.4	11	2	-1.4	2.00974	3.31662	2	1.30689	1.86667	3.86667	1	1.86667	3.86667	2	2	6	6	2	0	7.6	5.2	2.18	2.55	0.01	1	1.51	1	6.22	0	2.26	1
2	2	2	43	2	0	1	0	26.22	2	N	0	N	1	N	0	8.51	6.4	-2.11	19.6	7.7	1	-11.9	3.81182	2.77489	2	-1.03694	5.7	3.73333	1	5.7	3.73333	2	-1.96667	12.4	8.6	2	-3.8	9.9	9.5	2.33	2.53	0.022	1	6.76	0	4.98	1	0.94	0
2	1	2	45	2	0	5	1	25.47	2	N	0	N	1	N	0	5.7	4.9	-0.8	10.5	7	1	-3.5	2.32942	2.64575	2	0.316333	4.2	3.1	1	4.2	3.1	2	-1.1	6.6	6.7	2	0.1	8.8	8	2.44	1.87	0.054	1	3.04	0	3.48	1	0.86	0
2	2	2	50	2	0	3	0	23.9	3	Y	1	Y	0	N	0	5.66	6.8	1.14	10.6	9.8	2	-0.8	1.95594	3.1305	2	1.17455	3.13333	2.73333	1	3.13333	2.73333	2	-0.4	6.2	4	1	-2.2	6.4	5.9	2.73	2.22	0.155	0	0.91	1	5.36	0	1.84	1
2	2	2	60	2	0	12	1	23.81	3	Y	1	N	1	N	0	22.34	7.4	-14.94	15	9.3	2	-5.7	2.9385	3.04959	2	0.111094	2.76667	3.8	1	2.76667	3.8	2	1.03333	9.2	9	2	-0.2	11.1	9.1	2.5	1.98	0.029	1	1.87	0	3.97	1	0.88	0
2	2	2	66	1	0	1	0	23.23	3	N	0	Y	0	N	0	8.52	7.5	-1.02	14.3	14.3	3	0	2.6498	3.78153	2	1.13174	4	5.56667	2	4	5.56667	2	1.56667	7.2	8.9	2	1.7	8.8	6.9	2.51	2.78	0.04	1	1.68	1	4.92	1	1.88	1
2	2	2	66	1	0	8	1	21.36	3	Y	1	N	1	N	0	4.98	6.9	1.92	11.8	11.8	3	0	2.6947	3.43511	2	0.740409	4.9	2.4	1	4.9	2.4	2	-2.5	7.4	7.3	2	-0.1	9.5	8.1	2.8	2.01	0.009	1	1.39	1	3.37	1	1.04	1
2	1	2	68	1	0	3	0	22.2	3	Y	1	N	1	N	0	11.05	7	-4.05	15.9	12.9	3	-3	3.48124	3.59166	2	0.110415	4.03333	1.96667	1	4.03333	1.96667	1	-2.06667	8.9	8.4	2	-0.5	12.4	8.9	4.22	2.51	0.13	1	1.3	1	3.05	1	0.8	0
2	1	2	57	2	0	17	1	21.63	3	N	0	Y	0	N	0	8.2	7.7	-0.5	8	8.4	2	0.4	3.65044	2.89828	2	-0.752165	4.5	0.866667	1	4.5	0.866667	1	-3.63333	9.3	6.3	2	-3	6.6	6.2	2.58	1.8	0.07	1	0.64	1	2.65	1	1.04	1
2	1	2	45	2	0	6	1	29.37	1	Y	1	N	1	N	0	11.49	10	-1.49	15.6	12.5	3	-3.1	2.30124	3.53553	2	1.23429	3.03333	4.26667	2	3.03333	4.26667	2	1.23333	6.4	7.5	2	1.1	8.3	7	2.82	3.68	0.05	1	4.11	0	3.37	1	0.95	0
2	1	2	48	2	0	3	0	23.15	3	Y	1	Y	0	Y	1	9.93	8.1	-1.83	17	13.2	3	-3.8	2.86165	3.63318	2	0.771529	4.53333	4.03333	2	4.53333	4.03333	2	-0.5	8.1	6.4	2	-1.7	7.5	6.6	2.47	2.11	0.37	0	2.02	0	4.87	1	1.09	1
2	1	2	69	1	0	7	1	24.62	2	Y	1	N	1	N	0	15.56	8.7	-6.86	17.2	16.1	3	-1.1	3.02072	4.01248	2	0.991758	4.6	5	2	4.6	5	2	0.4	8.9	9.8	2	0.9	7.8	6.7	2.81	1.3	0.38	0	0.9	1	4.9	1	1.35	1
2	2	2	66	1	0	15	1	23.61	3	Y	1	Y	0	N	0	5.3	9.3	4	11.1	13	3	1.9	2.04893	3.60555	2	1.55663	0.966667	2.73333	1	0.966667	2.73333	2	1.76667	5.4	5.3	2	-0.1	6.6	5.6	2.72	1.9	0.03	1	2.25	0	4.53	1	1.27	1
2	1	2	48	2	0	3	0	22.99	3	N	0	Y	0	N	0	10.68	6	-4.68	22	10.1	2	-11.9	4.3607	3.17805	2	-1.18265	2.83333	0.0666667	1	2.83333	0.0666667	1	-2.9	11	4.1	1	-6.9	11.2	7.7	3.65	2.88	0.01	1	7.13	0	4.74	1	0.81	0
2	1	2	56	2	0	6	1	22.28	3	N	0	Y	0	N	0	7.69	8	0.31	10	10	2	0	2.84396	3.16228	2	0.31832	2.1	0.7	1	2.1	0.7	1	-1.4	8.6	6.5	2	-2.1	6.5	6.9	2.84	3.26	0.03	1	7.39	0	5.18	1	0.64	0
2	2	2	51	2	0	2	0	22.47	3	Y	1	Y	0	N	0	9.55	7.2	-2.35	22.9	9.1	2	-13.8	5.43652	3.01662	2	-2.4199	7.9	6.2	2	7.9	6.2	2	-1.7	17.7	15	2	-2.7	8.4	9.1	2.45	2.3	0.08	1	1.83	0	4.86	1	1.31	1
2	1	2	29	3	1	2	0	28.71	1	N	0	Y	0	Y	1	14.24	8.5	-5.74	17.6	5.6	1	-12	2.74894	2.36643	2	-0.382507	3.4	1.66667	1	3.4	1.66667	1	-5.06667	7.1	5.4	2	-1.7	12	5.2	3.19	2.3	0.08	1	1.78	0	5.58	0	1.22	1
2	1	2	47	2	0	8	1	24.93	2	N	0	Y	0	N	0	9.18	9.6	0.42	12.6	12.5	3	-0.1	2.70617	3.53553	2	0.829368	1	0.133333	1	1	0.133333	1	-0.866667	7.8	8.1	2	0.3	9.1	9.5	3.64	2.87	0.01	1	1.39	1	3.74	1	0.96	0
2	1	2	56	2	0	25	1	28.72	1	Y	1	N	1	N	0	10.86	6.4	-4.46	11.3	12.8	3	1.5	2.80399	3.57771	2	0.773715	1.66667	0.3	1	1.66667	0.3	1	1.36667	6.8	6.4	2	-0.4	9.7	8	3.4	2.77	0.07	1	1.23	1	3.24	1	0.9	0
2	1	2	41	2	0	4	0	26.73	2	Y	1	Y	0	N	0	6.07	5.8	-0.27	11.5	11.5	3	0	3.19784	3.39116	2	0.193323	3.26667	4.26667	2	3.26667	4.26667	2	1	9.3	6.8	2	-2.5	8.4	7.7	3.3	2.25	0.03	1	1.32	1	3.06	1	0.91	0
[truncated: 10 more columns]

## Sheet: Data Identification
Number	Group (1: M+A; 2: M+R)	gender	ethnic group	age	grouping based on age	education	medical history	grouping based on MRN	BMI	gruoping based on BMI	hypertension	hypertension_A	CVD	CVD_A	CKD	CKD_A	FPG（before）	FPG (Post-treatment)	fasting difference	2hPG (before)	2hPG (Post-treatment)	2hPG（Post-treatment）	Postprandial differences in blood sugar	SDBG (Pre-treatment)	SDBG (Post-treatment)	Group according to SDBG (Post-treatment)	SDBG difference	MAGE (Pre-treatment)	MAGE (Post-treatment)	MAGE (Post-treatment)	PPGE (Pre-treatment)	PPGE (Post-treatment)	Group according to PPGE (Post-treatment)	PPGE difference	LAGE (Pre-treatment)	LAGE (Post-treatment)	LAGE (Post-treatment)	LAGE difference	HbA1c	HbA1c (Endpoint)	Glycosylated serum protein normal range (1.7-2.8mmol/L)	Glycosylated serum protein (Endpoint)	24h urine protein	Group according to 24h urine protein	TG	Group according to TG	TC	Group according to TC	HDL
0						below Bachelor					none		none		none																													≥ 0.15g/24h		≥ 1.83		≤ 5.7
1	M + A	male	Han ethnicity	≥ 50		bachelor or above degree	≥ 20 yrs			≥ 30	yes		yes		yes							> 3.9 and ≤ 7.8				< 1.4				< 3.9			< 2.2				< 4.4							< 0.15g/24h		< 1.83		> 5.7
2	M + R	female	non-Han ethnicity	≥ 30 and < 50			≥ 10 and < 20			≥ 25 and < 30												> 7.8 and < 11.1				≥ 1.4				≥ 3.9			≥ 2.2				≥ 4.4
3				< 30			< 10			≥ 23 and < 25												≥ 11.1
4										18.5-22.9 Kg/m2
[truncated: 11 more columns]
